# Supplementary material for: [3 + 2] cycloaddition of azido-bridged molybdenum(ii) complex with nitriles and alkynes
Source: Royal Society of Chemistry journal article supplement (doi:10.1039/c9dt02659b), 2019-01-01
Supplement: c9dt02659b1.pdf [file c9dt02659b1.pdf]

## Supporting Information

### [3+2] Cycloaddition of azido-bridged molybdenum(II) complex with nitriles and alkynes

You-Xuan Chen,<sup>a</sup> Hsueh-Hui Yang<sup>b</sup>, Yu-Liang Lin,<sup>a</sup> Ji-Kuan Hou,<sup>a</sup> Yong-Jui Chu,<sup>a</sup> Fu-Chen Liu,<sup>\*a</sup> Gene-Hsiang Lee<sup>c</sup>

<sup>a</sup>Department of Chemistry, National Dong Hwa University, Hualien 974, Taiwan, ROC

<sup>b</sup> Department of Medical Research, Buddhist Tzu Chi General Hospital, Hualien, 970, Taiwan, ROC

<sup>c</sup>Department of Chemistry, National Taiwan University, Taipei 106, Taiwan, ROC

Table S1. Crystal data and structure refinement for  $[\text{N}(\text{CH}_3)_4][(\mu_{1,1}\text{-N}_3)_3\{\text{Mo}(\eta^3\text{-C}_3\text{H}_5)(\text{CO})_2\}_2]$  1pg

Table S2. Bond lengths [Å] and angles [°] for  $[\text{N}(\text{CH}_3)_4][(\mu_{1,1}\text{-N}_3)_3\{\text{Mo}(\eta^3\text{-C}_3\text{H}_5)(\text{CO})_2\}_2]$  2pg

Table S3. Crystal data and structure refinement for  $[\text{N}(\text{CH}_3)_4][(\mu\text{-N}_4\text{C}\{\text{C}(\text{CN})=\text{C}(\text{CN})_2\}-\kappa^2\text{N}^2:\text{N}^3)(\mu_{1,1}\text{-N}_3)_2\{\text{Mo}(\eta^3\text{-C}_3\text{H}_5)(\text{CO})_2\}_2]$  1pg

Table S4. Bond lengths [Å] and angles [°] for  $[\text{N}(\text{CH}_3)_4][(\mu\text{-N}_4\text{C}\{\text{C}(\text{CN})=\text{C}(\text{CN})_2\}-\kappa^2\text{N}^2:\text{N}^3)(\mu_{1,1}\text{-N}_3)_2\{\text{Mo}(\eta^3\text{-C}_3\text{H}_5)(\text{CO})_2\}_2]$  3pg

Table S5. Crystal data and structure refinement for  $[\text{N}(\text{CH}_3)_4][(\mu\text{-N}_4\text{C}\{\text{C}_6\text{H}_4\text{NO}_2\}-\kappa^2\text{N}^2:\text{N}^3)(\mu_{1,1}\text{-N}_3)_2\{\text{Mo}(\eta^3\text{-C}_3\text{H}_5)(\text{CO})_2\}_2]$  1pg

Table S6. Bond lengths [Å] and angles [°] for  $[\text{N}(\text{CH}_3)_4][(\mu\text{-N}_4\text{C}\{\text{C}_6\text{H}_4\text{NO}_2\}-\kappa^2\text{N}^2:\text{N}^3)(\mu_{1,1}\text{-N}_3)_2\{\text{Mo}(\eta^3\text{-C}_3\text{H}_5)(\text{CO})_2\}_2]$  2pg

Table S7. Crystal data and structure refinement for  $[\text{N}(\text{CH}_3)_4][(\mu\text{-N}_4\text{C}\{\text{C}(\text{CN})=\text{C}(\text{CN})_2\}-\kappa^2\text{N}^2:\text{N}^3)_2(\mu_{1,1}\text{-N}_3)_2\{\text{Mo}(\eta^3\text{-C}_3\text{H}_5)(\text{CO})_2\}_2]\cdot\text{CH}_2\text{Cl}_2$  1pg

Table S8. Bond lengths [Å] and angles [°] for  $[\text{N}(\text{CH}_3)_4][(\mu\text{-N}_4\text{C}\{\text{C}(\text{CN})=\text{C}(\text{CN})_2\}-\kappa^2\text{N}^2:\text{N}^3)_2(\mu_{1,1}\text{-N}_3)\{\text{Mo}(\eta^3\text{-C}_3\text{H}_5)(\text{CO})_2\}_2]\cdot\text{CH}_2\text{Cl}_2$  3pg

Table S9. Crystal data and structure refinement for  $[\text{N}(\text{CH}_3)_4][(\mu\text{-N}_4\text{C}\{\text{C}_6\text{H}_4\text{NO}_2\}-\kappa^2\text{N}^2:\text{N}^3)_2(\mu_{1,1}\text{-N}_3)\{\text{Mo}(\eta^3\text{-C}_3\text{H}_5)(\text{CO})_2\}_2]\cdot\text{THF}$  1pg

Table S10. Bond lengths [Å] and angles [°] for  $[\text{N}(\text{CH}_3)_4][(\mu\text{-N}_4\text{C}\{\text{C}_6\text{H}_4\text{NO}_2\}-\kappa^2\text{N}^2:\text{N}^3)_2(\mu_{1,1}\text{-N}_3)\{\text{Mo}(\eta^3\text{-C}_3\text{H}_5)(\text{CO})_2\}_2]\cdot\text{THF}$  3pg

Table S11. Crystal data and structure refinement for  $[\text{N}(\text{CH}_3)_4][(\mu\text{-N}_3\text{C}_2\{\text{CO}_2\text{CH}_3\}_2-\kappa^2\text{N}^1:\text{N}^2)(\mu_{1,1}\text{-N}_3)_2\{\text{Mo}(\eta^3\text{-C}_3\text{H}_5)(\text{CO})_2\}_2]$  1pg

Table S12. Bond lengths [Å] and angles [°] for  $[\text{N}(\text{CH}_3)_4][(\mu\text{-N}_3\text{C}_2\{\text{CO}_2\text{CH}_3\}_2-\kappa^2\text{N}^1:\text{N}^2)(\mu_{1,1}\text{-N}_3)_2\{\text{Mo}(\eta^3\text{-C}_3\text{H}_5)(\text{CO})_2\}_2]$  2pg

Table S13. Crystal data and structure refinement for  $[\text{N}(\text{CH}_3)_4][(\mu\text{-N}_3\text{C}_2\{\text{CO}_2\text{CH}_2\text{CH}_3\}_2-\kappa^2\text{N}^1:\text{N}^2)(\mu_{1,1}\text{-N}_3)_2\{\text{Mo}(\eta^3\text{-C}_3\text{H}_5)(\text{CO})_2\}_2]\cdot 1/2(\text{THF})$  1pg

Table S14. Bond lengths [Å] and angles [°] for  $[\text{N}(\text{CH}_3)_4][(\mu\text{-N}_3\text{C}_2\{\text{CO}_2\text{CH}_2\text{CH}_3\}_2-\kappa^2\text{N}^1:\text{N}^2)(\mu_{1,1}\text{-N}_3)_2\{\text{Mo}(\eta^3\text{-C}_3\text{H}_5)(\text{CO})_2\}_2]\cdot 1/2(\text{THF})$  4pg

Table S1. Crystal data and structure refinement for  $[\text{N}(\text{CH}_3)_4][(\mu_{1,1}\text{-N}_3)_3\{\text{Mo}(\eta^3\text{-C}_3\text{H}_5)(\text{CO})_2\}_2]$ 

---

|                                       |                                                                    |                                |
|---------------------------------------|--------------------------------------------------------------------|--------------------------------|
| Empirical formula                     | $\text{C}_{14}\text{H}_{22}\text{Mo}_2\text{N}_{10}\text{O}_4$     |                                |
| Formula weight                        | 586.30                                                             |                                |
| Temperature                           | 150(2) K                                                           |                                |
| Wavelength                            | 0.71073 Å                                                          |                                |
| Crystal system                        | Monoclinic                                                         |                                |
| Space group                           | C2/m                                                               |                                |
| Unit cell dimensions                  | $a = 11.3025(7)$ Å                                                 | $\alpha = 90^\circ$ .          |
|                                       | $b = 19.3312(12)$ Å                                                | $\beta = 114.6150(10)^\circ$ . |
|                                       | $c = 10.8564(7)$ Å                                                 | $\gamma = 90^\circ$ .          |
| Volume                                | $2156.5(2)$ Å <sup>3</sup>                                         |                                |
| Z                                     | 4                                                                  |                                |
| Density (calculated)                  | $1.806$ Mg/m <sup>3</sup>                                          |                                |
| Absorption coefficient                | $1.206$ mm <sup>-1</sup>                                           |                                |
| F(000)                                | 1168                                                               |                                |
| Crystal size                          | $0.35 \times 0.25 \times 0.18$ mm <sup>3</sup>                     |                                |
| Theta range for data collection       | $2.06$ to $27.50^\circ$ .                                          |                                |
| Index ranges                          | $-14 \leq h \leq 14$ , $-25 \leq k \leq 25$ , $-14 \leq l \leq 14$ |                                |
| Reflections collected                 | 8326                                                               |                                |
| Independent reflections               | 2555 [R(int) = 0.0198]                                             |                                |
| Completeness to theta = $27.50^\circ$ | 100.0 %                                                            |                                |
| Absorption correction                 | Semi-empirical from equivalents                                    |                                |
| Max. and min. transmission            | 0.8122 and 0.6776                                                  |                                |
| Refinement method                     | Full-matrix least-squares on F <sup>2</sup>                        |                                |
| Data / restraints / parameters        | 2555 / 2 / 172                                                     |                                |
| Goodness-of-fit on F <sup>2</sup>     | 1.083                                                              |                                |
| Final R indices [I > 2σ(I)]           | R1 = 0.0182, wR2 = 0.0467                                          |                                |
| R indices (all data)                  | R1 = 0.0202, wR2 = 0.0477                                          |                                |
| Largest diff. peak and hole           | $0.350$ and $-0.389$ e.Å <sup>-3</sup>                             |                                |

---

Table S2. Bond lengths [Å] and angles [°] for  $[\text{N}(\text{CH}_3)_4][(\mu_{1,1}\text{-N}_3)_3\{\text{Mo}(\eta^3\text{-C}_3\text{H}_5)(\text{CO})_2\}_2]$ 

|              |            |                     |            |
|--------------|------------|---------------------|------------|
| Mo-C(2)      | 1.9440(18) | N(7)-Mo#1           | 2.2692(14) |
| Mo-C(1)      | 1.9460(18) | N(8)-N(9)           | 1.148(3)   |
| Mo-N(1)      | 2.1755(13) | C(1)-O(1)           | 1.157(2)   |
| Mo-C(4)      | 2.1994(18) | C(2)-O(2)           | 1.157(2)   |
| Mo-N(7)      | 2.2692(14) | C(3)-C(4)           | 1.407(3)   |
| Mo-N(4)      | 2.2846(14) | C(4)-C(5)           | 1.411(3)   |
| Mo-C(3)      | 2.3007(19) | N(10)-C(9)#2        | 1.388(17)  |
| Mo-C(5)      | 2.3159(18) | N(10)-C(9)          | 1.388(17)  |
| N(1)-N(2)    | 1.222(3)   | N(10)-C(6)#2        | 1.488(13)  |
| N(1)-Mo#1    | 2.1755(13) | N(10)-C(6)          | 1.488(13)  |
| N(2)-N(3)    | 1.126(3)   | N(10)-C(8)#2        | 1.498(13)  |
| N(4)-N(5)    | 1.210(3)   | N(10)-C(8)          | 1.498(13)  |
| N(4)-Mo#1    | 2.2846(14) | N(10)-C(7)#2        | 1.511(17)  |
| N(5)-N(6)    | 1.146(3)   | N(10)-C(7)          | 1.511(17)  |
| N(7)-N(8)    | 1.197(3)   |                     |            |
| C(2)-Mo-C(1) | 80.38(7)   | C(3)-Mo-C(5)        | 62.32(7)   |
| C(2)-Mo-N(1) | 93.68(7)   | N(2)-N(1)-Mo#1      | 129.54(5)  |
| C(1)-Mo-N(1) | 94.43(7)   | N(2)-N(1)-Mo        | 129.54(5)  |
| C(2)-Mo-C(4) | 104.56(8)  | Mo#1-N(1)-Mo        | 97.20(8)   |
| C(1)-Mo-C(4) | 104.26(8)  | N(3)-N(2)-N(1)      | 179.2(2)   |
| N(1)-Mo-C(4) | 155.68(7)  | N(5)-N(4)-Mo#1      | 127.58(8)  |
| C(2)-Mo-N(7) | 167.07(7)  | N(5)-N(4)-Mo        | 127.58(8)  |
| C(1)-Mo-N(7) | 98.65(7)   | Mo#1-N(4)-Mo        | 91.17(7)   |
| N(1)-Mo-N(7) | 73.50(6)   | N(6)-N(5)-N(4)      | 178.6(3)   |
| C(4)-Mo-N(7) | 88.21(7)   | N(8)-N(7)-Mo        | 130.50(7)  |
| C(2)-Mo-N(4) | 104.34(7)  | N(8)-N(7)-Mo#1      | 130.50(7)  |
| C(1)-Mo-N(4) | 165.16(6)  | Mo-N(7)-Mo#1        | 91.97(7)   |
| N(1)-Mo-N(4) | 71.40(6)   | N(9)-N(8)-N(7)      | 178.3(3)   |
| C(4)-Mo-N(4) | 88.34(7)   | O(1)-C(1)-Mo        | 179.28(16) |
| N(7)-Mo-N(4) | 73.54(6)   | O(2)-C(2)-Mo        | 176.59(16) |
| C(2)-Mo-C(3) | 70.54(8)   | C(4)-C(3)-Mo        | 67.90(10)  |
| C(1)-Mo-C(3) | 110.03(8)  | C(3)-C(4)-C(5)      | 115.96(19) |
| N(1)-Mo-C(3) | 147.40(7)  | C(3)-C(4)-Mo        | 75.75(11)  |
| C(4)-Mo-C(3) | 36.34(7)   | C(5)-C(4)-Mo        | 76.35(11)  |
| N(7)-Mo-C(3) | 121.34(8)  | C(4)-C(5)-Mo        | 67.35(10)  |
| N(4)-Mo-C(3) | 84.76(7)   | C(9)#2-N(10)-C(9)   | 126.0(15)  |
| C(2)-Mo-C(5) | 108.05(8)  | C(9)#2-N(10)-C(6)#2 | 95.6(11)   |
| C(1)-Mo-C(5) | 69.54(7)   | C(9)-N(10)-C(6)#2   | 115.5(10)  |
| N(1)-Mo-C(5) | 149.66(7)  | C(9)#2-N(10)-C(6)   | 115.5(10)  |
| C(4)-Mo-C(5) | 36.30(7)   | C(9)-N(10)-C(6)     | 95.6(11)   |
| N(7)-Mo-C(5) | 83.38(6)   | C(6)#2-N(10)-C(6)   | 108.9(11)  |
| N(4)-Mo-C(5) | 120.80(7)  | C(9)#2-N(10)-C(8)#2 | 93.8(10)   |

|                     |           |                     |           |
|---------------------|-----------|---------------------|-----------|
| C(9)-N(10)-C(8)#2   | 114.4(11) | C(6)-N(10)-C(7)#2   | 104.3(10) |
| C(6)#2-N(10)-C(8)#2 | 108.1(3)  | C(8)#2-N(10)-C(7)#2 | 119.3(10) |
| C(6)-N(10)-C(8)#2   | 22.3(7)   | C(8)-N(10)-C(7)#2   | 103.3(9)  |
| C(9)#2-N(10)-C(8)   | 114.4(11) | C(9)#2-N(10)-C(7)   | 15.9(14)  |
| C(9)-N(10)-C(8)     | 93.8(10)  | C(9)-N(10)-C(7)     | 110.1(6)  |
| C(6)#2-N(10)-C(8)   | 22.3(7)   | C(6)#2-N(10)-C(7)   | 104.3(10) |
| C(6)-N(10)-C(8)     | 108.1(3)  | C(6)-N(10)-C(7)     | 123.0(9)  |
| C(8)#2-N(10)-C(8)   | 116.2(11) | C(8)#2-N(10)-C(7)   | 103.3(9)  |
| C(9)#2-N(10)-C(7)#2 | 110.1(6)  | C(8)-N(10)-C(7)     | 119.3(10) |
| C(9)-N(10)-C(7)#2   | 15.9(14)  | C(7)#2-N(10)-C(7)   | 94.2(14)  |
| C(6)#2-N(10)-C(7)#2 | 123.0(9)  |                     |           |

---

Symmetry transformations used to generate equivalent atoms: #1 x,y,-z

Table S3. Crystal data and structure refinement for  $[\text{N}(\text{CH}_3)_4][(\mu\text{-N}_4\text{C}\{\text{C}(\text{CN})=\text{C}(\text{CN})_2\}\text{-}\kappa^2\text{N}^2:\text{N}^3)(\mu_{1,1}\text{-N}_3)_2\{\text{Mo}(\eta^3\text{-C}_3\text{H}_5)(\text{CO})_2\}_2]$

|                                       |                                                                    |                                |
|---------------------------------------|--------------------------------------------------------------------|--------------------------------|
| Empirical formula                     | $\text{C}_{20}\text{H}_{22}\text{Mo}_2\text{N}_{14}\text{O}_4$     |                                |
| Formula weight                        | 714.40                                                             |                                |
| Temperature                           | 150(2) K                                                           |                                |
| Wavelength                            | 0.71073 Å                                                          |                                |
| Crystal system                        | Monoclinic                                                         |                                |
| Space group                           | $\text{P}2(1)/n$                                                   |                                |
| Unit cell dimensions                  | $a = 11.1748(7)$ Å                                                 | $\alpha = 90^\circ$ .          |
|                                       | $b = 11.8254(8)$ Å                                                 | $\beta = 102.6262(14)^\circ$ . |
|                                       | $c = 21.7960(15)$ Å                                                | $\gamma = 90^\circ$ .          |
| Volume                                | $2810.6(3)$ Å <sup>3</sup>                                         |                                |
| Z                                     | 4                                                                  |                                |
| Density (calculated)                  | $1.688$ Mg/m <sup>3</sup>                                          |                                |
| Absorption coefficient                | $0.946$ mm <sup>-1</sup>                                           |                                |
| F(000)                                | 1424                                                               |                                |
| Crystal size                          | $0.50 \times 0.40 \times 0.02$ mm <sup>3</sup>                     |                                |
| Theta range for data collection       | $1.90$ to $27.50^\circ$ .                                          |                                |
| Index ranges                          | $-12 \leq h \leq 14$ , $-15 \leq k \leq 14$ , $-28 \leq l \leq 27$ |                                |
| Reflections collected                 | 17744                                                              |                                |
| Independent reflections               | 6456 [R(int) = 0.0480]                                             |                                |
| Completeness to theta = $27.50^\circ$ | 99.9 %                                                             |                                |
| Absorption correction                 | Semi-empirical from equivalents                                    |                                |
| Max. and min. transmission            | 0.9813 and 0.6491                                                  |                                |
| Refinement method                     | Full-matrix least-squares on F <sup>2</sup>                        |                                |
| Data / restraints / parameters        | 6456 / 56 / 374                                                    |                                |
| Goodness-of-fit on F <sup>2</sup>     | 1.014                                                              |                                |
| Final R indices [I > 2sigma(I)]       | R1 = 0.0466, wR2 = 0.1025                                          |                                |
| R indices (all data)                  | R1 = 0.0625, wR2 = 0.1098                                          |                                |
| Largest diff. peak and hole           | $1.540$ and $-0.597$ e.Å <sup>-3</sup>                             |                                |

Table S4. Bond lengths [Å] and angles [°] for  $[\text{N}(\text{CH}_3)_4][(\mu\text{-N}_4\text{C}\{\text{C}(\text{CN})=\text{C}(\text{CN})_2\}-\kappa^2\text{N}^2:\text{N}^3)(\mu_{1,1}\text{-N}_3)_2\{\text{Mo}(\eta^3\text{-C}_3\text{H}_5)(\text{CO})_2\}_2]$

|                 |            |                 |            |
|-----------------|------------|-----------------|------------|
| Mo(1)-C(2)      | 1.942(5)   | N(11)-C(14)     | 1.131(6)   |
| Mo(1)-C(1)      | 1.951(5)   | N(12)-C(15)     | 1.135(6)   |
| Mo(1)-N(1)      | 2.195(3)   | N(13)-C(16)     | 1.127(6)   |
| Mo(1)-C(6)      | 2.208(5)   | C(1)-O(1)       | 1.148(6)   |
| Mo(1)-N(8)      | 2.268(3)   | C(2)-O(2)       | 1.150(6)   |
| Mo(1)-N(4)      | 2.274(3)   | C(3)-O(3)       | 1.156(5)   |
| Mo(1)-C(5)      | 2.305(5)   | C(4)-O(4)       | 1.157(5)   |
| Mo(1)-C(7)      | 2.319(5)   | C(5)-C(6)       | 1.394(8)   |
| Mo(2)-C(4)      | 1.932(4)   | C(6)-C(7)       | 1.417(8)   |
| Mo(2)-C(3)      | 1.938(5)   | C(8)-C(9)       | 1.397(7)   |
| Mo(2)-N(1)      | 2.187(3)   | C(9)-C(10)      | 1.393(7)   |
| Mo(2)-C(9)      | 2.195(4)   | C(11)-C(12)     | 1.446(5)   |
| Mo(2)-N(9)      | 2.260(3)   | C(12)-C(13)     | 1.355(6)   |
| Mo(2)-N(4)      | 2.275(3)   | C(12)-C(14)     | 1.443(6)   |
| Mo(2)-C(8)      | 2.313(5)   | C(13)-C(16)     | 1.434(6)   |
| Mo(2)-C(10)     | 2.320(4)   | C(13)-C(15)     | 1.435(6)   |
| N(1)-N(2)       | 1.213(5)   | N(14)-C(20)     | 1.413(10)  |
| N(2)-N(3)       | 1.129(5)   | N(14)-C(18')    | 1.443(14)  |
| N(4)-N(5)       | 1.195(5)   | N(14)-C(18)     | 1.486(15)  |
| N(5)-N(6)       | 1.146(5)   | N(14)-C(19')    | 1.489(13)  |
| N(7)-N(8)       | 1.320(5)   | N(14)-C(17')    | 1.492(12)  |
| N(7)-C(11)      | 1.336(5)   | N(14)-C(17)     | 1.500(13)  |
| N(8)-N(9)       | 1.346(4)   | N(14)-C(19)     | 1.533(14)  |
| N(9)-N(10)      | 1.319(5)   | N(14)-C(20')    | 1.556(10)  |
| N(10)-C(11)     | 1.333(5)   |                 |            |
| C(2)-Mo(1)-C(1) | 77.1(2)    | C(1)-Mo(1)-C(5) | 112.1(2)   |
| C(2)-Mo(1)-N(1) | 94.58(17)  | N(1)-Mo(1)-C(5) | 149.45(17) |
| C(1)-Mo(1)-N(1) | 90.39(18)  | C(6)-Mo(1)-C(5) | 35.89(19)  |
| C(2)-Mo(1)-C(6) | 104.1(2)   | N(8)-Mo(1)-C(5) | 117.78(17) |
| C(1)-Mo(1)-C(6) | 105.0(2)   | N(4)-Mo(1)-C(5) | 85.37(17)  |
| N(1)-Mo(1)-C(6) | 157.95(16) | C(2)-Mo(1)-C(7) | 104.02(19) |
| C(2)-Mo(1)-N(8) | 170.19(17) | C(1)-Mo(1)-C(7) | 69.7(2)    |
| C(1)-Mo(1)-N(8) | 99.02(16)  | N(1)-Mo(1)-C(7) | 148.42(17) |
| N(1)-Mo(1)-N(8) | 76.33(12)  | C(6)-Mo(1)-C(7) | 36.4(2)    |
| C(6)-Mo(1)-N(8) | 85.57(16)  | N(8)-Mo(1)-C(7) | 82.69(16)  |
| C(2)-Mo(1)-N(4) | 102.50(16) | N(4)-Mo(1)-C(7) | 127.80(17) |
| C(1)-Mo(1)-N(4) | 160.93(18) | C(5)-Mo(1)-C(7) | 62.0(2)    |
| N(1)-Mo(1)-N(4) | 70.58(12)  | C(4)-Mo(2)-C(3) | 78.48(19)  |
| C(6)-Mo(1)-N(4) | 93.66(17)  | C(4)-Mo(2)-N(1) | 93.16(16)  |
| N(8)-Mo(1)-N(4) | 78.19(12)  | C(3)-Mo(2)-N(1) | 93.16(17)  |
| C(2)-Mo(1)-C(5) | 72.0(2)    | C(4)-Mo(2)-C(9) | 104.0(2)   |

|                  |            |                     |           |
|------------------|------------|---------------------|-----------|
| C(3)-Mo(2)-C(9)  | 103.90(19) | C(5)-C(6)-Mo(1)     | 75.9(3)   |
| N(1)-Mo(2)-C(9)  | 157.80(15) | C(7)-C(6)-Mo(1)     | 76.1(3)   |
| C(4)-Mo(2)-N(9)  | 99.87(16)  | C(6)-C(7)-Mo(1)     | 67.5(3)   |
| C(3)-Mo(2)-N(9)  | 169.58(16) | C(9)-C(8)-Mo(2)     | 67.4(3)   |
| N(1)-Mo(2)-N(9)  | 76.60(12)  | C(10)-C(9)-C(8)     | 116.2(4)  |
| C(9)-Mo(2)-N(9)  | 86.50(15)  | C(10)-C(9)-Mo(2)    | 77.0(3)   |
| C(4)-Mo(2)-N(4)  | 163.81(16) | C(8)-C(9)-Mo(2)     | 76.6(3)   |
| C(3)-Mo(2)-N(4)  | 100.79(17) | C(9)-C(10)-Mo(2)    | 67.2(3)   |
| N(1)-Mo(2)-N(4)  | 70.69(12)  | N(10)-C(11)-N(7)    | 113.3(3)  |
| C(9)-Mo(2)-N(4)  | 91.93(16)  | N(10)-C(11)-C(12)   | 124.5(4)  |
| N(9)-Mo(2)-N(4)  | 77.88(12)  | N(7)-C(11)-C(12)    | 122.2(4)  |
| C(4)-Mo(2)-C(8)  | 108.92(19) | C(13)-C(12)-C(14)   | 118.1(4)  |
| C(3)-Mo(2)-C(8)  | 70.38(19)  | C(13)-C(12)-C(11)   | 125.3(4)  |
| N(1)-Mo(2)-C(8)  | 148.37(17) | C(14)-C(12)-C(11)   | 116.6(4)  |
| C(9)-Mo(2)-C(8)  | 36.00(18)  | C(12)-C(13)-C(16)   | 123.9(4)  |
| N(9)-Mo(2)-C(8)  | 119.55(16) | C(12)-C(13)-C(15)   | 120.1(4)  |
| N(4)-Mo(2)-C(8)  | 85.67(16)  | C(16)-C(13)-C(15)   | 116.0(4)  |
| C(4)-Mo(2)-C(10) | 69.9(2)    | N(11)-C(14)-C(12)   | 178.6(6)  |
| C(3)-Mo(2)-C(10) | 106.89(19) | N(12)-C(15)-C(13)   | 177.9(5)  |
| N(1)-Mo(2)-C(10) | 149.89(16) | N(13)-C(16)-C(13)   | 175.1(5)  |
| C(9)-Mo(2)-C(10) | 35.82(19)  | C(20)-N(14)-C(18')  | 135.1(11) |
| N(9)-Mo(2)-C(10) | 81.87(14)  | C(20)-N(14)-C(18)   | 118.3(11) |
| N(4)-Mo(2)-C(10) | 124.90(16) | C(18')-N(14)-C(18)  | 30.9(11)  |
| C(8)-Mo(2)-C(10) | 61.53(19)  | C(20)-N(14)-C(19')  | 77.1(9)   |
| N(2)-N(1)-Mo(2)  | 123.3(3)   | C(18')-N(14)-C(19') | 99.9(12)  |
| N(2)-N(1)-Mo(1)  | 128.1(3)   | C(18)-N(14)-C(19')  | 126.0(13) |
| Mo(2)-N(1)-Mo(1) | 107.93(14) | C(20)-N(14)-C(17')  | 114.1(9)  |
| N(3)-N(2)-N(1)   | 178.5(5)   | C(18')-N(14)-C(17') | 101.9(11) |
| N(5)-N(4)-Mo(1)  | 130.0(3)   | C(18)-N(14)-C(17')  | 92.6(12)  |
| N(5)-N(4)-Mo(2)  | 127.6(3)   | C(19')-N(14)-C(17') | 130.3(11) |
| Mo(1)-N(4)-Mo(2) | 102.31(13) | C(20)-N(14)-C(17)   | 101.2(10) |
| N(6)-N(5)-N(4)   | 179.2(5)   | C(18')-N(14)-C(17)  | 122.3(12) |
| N(8)-N(7)-C(11)  | 103.6(3)   | C(18)-N(14)-C(17)   | 119.7(12) |
| N(7)-N(8)-N(9)   | 109.7(3)   | C(19')-N(14)-C(17)  | 105.0(11) |
| N(7)-N(8)-Mo(1)  | 131.6(3)   | C(17')-N(14)-C(17)  | 27.5(8)   |
| N(9)-N(8)-Mo(1)  | 118.7(2)   | C(20)-N(14)-C(19)   | 112.5(10) |
| N(10)-N(9)-N(8)  | 109.5(3)   | C(18')-N(14)-C(19)  | 74.2(11)  |
| N(10)-N(9)-Mo(2) | 131.1(2)   | C(18)-N(14)-C(19)   | 105.0(12) |
| N(8)-N(9)-Mo(2)  | 119.4(2)   | C(19')-N(14)-C(19)  | 35.4(9)   |
| N(9)-N(10)-C(11) | 103.9(3)   | C(17')-N(14)-C(19)  | 112.7(11) |
| O(1)-C(1)-Mo(1)  | 175.5(5)   | C(17)-N(14)-C(19)   | 98.8(11)  |
| O(2)-C(2)-Mo(1)  | 175.9(4)   | C(20)-N(14)-C(20')  | 38.3(6)   |
| O(3)-C(3)-Mo(2)  | 175.8(4)   | C(18')-N(14)-C(20') | 105.7(10) |
| O(4)-C(4)-Mo(2)  | 174.8(4)   | C(18)-N(14)-C(20')  | 81.3(10)  |
| C(6)-C(5)-Mo(1)  | 68.2(3)    | C(19')-N(14)-C(20') | 107.0(9)  |
| C(5)-C(6)-C(7)   | 115.7(5)   | C(17')-N(14)-C(20') | 109.1(9)  |



C(17)-N(14)-C(20') 114.9(9)

C(19)-N(14)-C(20') 137.2(9)

---

Symmetry transformations used to generate equivalent atoms:

Table S5. Crystal data and structure refinement for  $[\text{N}(\text{CH}_3)_4][(\mu\text{-N}_4\text{C}\{\text{C}_6\text{H}_4\text{NO}_2\}\text{-}\kappa^2\text{N}^2:\text{N}^3)(\mu_{1,1}\text{-N}_3)_2\{\text{Mo}(\eta^3\text{-C}_3\text{H}_5)(\text{CO})_2\}_2]$

|                                       |                                                                    |                              |
|---------------------------------------|--------------------------------------------------------------------|------------------------------|
| Empirical formula                     | $\text{C}_{21}\text{H}_{26}\text{Mo}_2\text{N}_{12}\text{O}_6$     |                              |
| Formula weight                        | 734.42                                                             |                              |
| Temperature                           | 150(2) K                                                           |                              |
| Wavelength                            | 0.71073 Å                                                          |                              |
| Crystal system                        | Monoclinic                                                         |                              |
| Space group                           | $\text{C}2/c$                                                      |                              |
| Unit cell dimensions                  | $a = 18.9939(4)$ Å                                                 | $\alpha = 90^\circ$ .        |
|                                       | $b = 10.7176(2)$ Å                                                 | $\beta = 92.2762(8)^\circ$ . |
|                                       | $c = 28.9030(5)$ Å                                                 | $\gamma = 90^\circ$ .        |
| Volume                                | $5879.11(19)$ Å <sup>3</sup>                                       |                              |
| Z                                     | 8                                                                  |                              |
| Density (calculated)                  | $1.659$ Mg/m <sup>3</sup>                                          |                              |
| Absorption coefficient                | $0.910$ mm <sup>-1</sup>                                           |                              |
| F(000)                                | 2944                                                               |                              |
| Crystal size                          | $0.25 \times 0.15 \times 0.14$ mm <sup>3</sup>                     |                              |
| Theta range for data collection       | $1.41$ to $27.50^\circ$ .                                          |                              |
| Index ranges                          | $-24 \leq h \leq 24$ , $-11 \leq k \leq 13$ , $-21 \leq l \leq 37$ |                              |
| Reflections collected                 | 23263                                                              |                              |
| Independent reflections               | 6705 [R(int) = 0.0460]                                             |                              |
| Completeness to theta = $27.50^\circ$ | 99.4 %                                                             |                              |
| Absorption correction                 | Semi-empirical from equivalents                                    |                              |
| Max. and min. transmission            | 0.874 and 0.796                                                    |                              |
| Refinement method                     | Full-matrix least-squares on F <sup>2</sup>                        |                              |
| Data / restraints / parameters        | 6705 / 0 / 374                                                     |                              |
| Goodness-of-fit on F <sup>2</sup>     | 1.020                                                              |                              |
| Final R indices [I > 2sigma(I)]       | R1 = 0.0327, wR2 = 0.0696                                          |                              |
| R indices (all data)                  | R1 = 0.0568, wR2 = 0.0848                                          |                              |
| Largest diff. peak and hole           | $0.505$ and $-0.593$ e.Å <sup>-3</sup>                             |                              |

Table S6. Bond lengths [Å] and angles [°] for  $[\text{N}(\text{CH}_3)_4][(\mu\text{-N}_4\text{C}\{\text{C}_6\text{H}_4\text{NO}_2\}-\kappa^2\text{N}^2:\text{N}^3)(\mu_{1,1}\text{-N}_3)_2\{\text{Mo}(\eta^3\text{-C}_3\text{H}_5)(\text{CO})_2\}_2]$

|                 |            |                 |            |
|-----------------|------------|-----------------|------------|
| Mo(1)-C(1)      | 1.941(3)   | N(10)-C(11)     | 1.343(3)   |
| Mo(1)-C(2)      | 1.954(3)   | N(11)-O(6)      | 1.228(4)   |
| Mo(1)-N(4)      | 2.186(2)   | N(11)-O(5)      | 1.232(3)   |
| Mo(1)-C(6)      | 2.212(3)   | N(11)-C(15)     | 1.475(4)   |
| Mo(1)-N(8)      | 2.245(2)   | C(1)-O(1)       | 1.165(4)   |
| Mo(1)-N(1)      | 2.304(2)   | C(2)-O(2)       | 1.162(3)   |
| Mo(1)-C(7)      | 2.327(3)   | C(3)-O(3)       | 1.161(3)   |
| Mo(1)-C(5)      | 2.336(3)   | C(4)-O(4)       | 1.162(4)   |
| Mo(2)-C(3)      | 1.949(3)   | C(5)-C(6)       | 1.406(4)   |
| Mo(2)-C(4)      | 1.953(3)   | C(6)-C(7)       | 1.406(4)   |
| Mo(2)-N(4)      | 2.187(2)   | C(8)-C(9)       | 1.402(5)   |
| Mo(2)-C(9)      | 2.209(3)   | C(9)-C(10)      | 1.413(5)   |
| Mo(2)-N(9)      | 2.249(2)   | C(11)-C(12)     | 1.464(4)   |
| Mo(2)-N(1)      | 2.302(2)   | C(12)-C(13)     | 1.387(4)   |
| Mo(2)-C(8)      | 2.321(3)   | C(12)-C(17)     | 1.400(4)   |
| Mo(2)-C(10)     | 2.329(3)   | C(13)-C(14)     | 1.385(4)   |
| N(1)-N(2)       | 1.215(3)   | C(14)-C(15)     | 1.375(4)   |
| N(2)-N(3)       | 1.144(3)   | C(15)-C(16)     | 1.387(4)   |
| N(4)-N(5)       | 1.223(3)   | C(16)-C(17)     | 1.378(4)   |
| N(5)-N(6)       | 1.135(3)   | N(12)-C(18)     | 1.480(4)   |
| N(7)-N(8)       | 1.338(3)   | N(12)-C(19)     | 1.483(4)   |
| N(7)-C(11)      | 1.339(4)   | N(12)-C(20)     | 1.494(4)   |
| N(8)-N(9)       | 1.335(3)   | N(12)-C(21)     | 1.497(4)   |
| N(9)-N(10)      | 1.330(3)   |                 |            |
|                 |            |                 |            |
| C(1)-Mo(1)-C(2) | 80.96(12)  | C(6)-Mo(1)-C(7) | 35.97(11)  |
| C(1)-Mo(1)-N(4) | 91.41(10)  | N(8)-Mo(1)-C(7) | 117.22(10) |
| C(2)-Mo(1)-N(4) | 92.47(10)  | N(1)-Mo(1)-C(7) | 83.69(10)  |
| C(1)-Mo(1)-C(6) | 103.52(12) | C(1)-Mo(1)-C(5) | 68.43(12)  |
| C(2)-Mo(1)-C(6) | 105.48(12) | C(2)-Mo(1)-C(5) | 106.18(12) |
| N(4)-Mo(1)-C(6) | 158.11(11) | N(4)-Mo(1)-C(5) | 149.31(10) |
| C(1)-Mo(1)-N(8) | 96.56(10)  | C(6)-Mo(1)-C(5) | 35.89(11)  |
| C(2)-Mo(1)-N(8) | 169.65(11) | N(8)-Mo(1)-C(5) | 81.97(10)  |
| N(4)-Mo(1)-N(8) | 77.50(8)   | N(1)-Mo(1)-C(5) | 126.55(10) |
| C(6)-Mo(1)-N(8) | 84.87(10)  | C(7)-Mo(1)-C(5) | 61.66(11)  |
| C(1)-Mo(1)-N(1) | 163.11(11) | C(3)-Mo(2)-C(4) | 81.27(12)  |
| C(2)-Mo(1)-N(1) | 99.84(10)  | C(3)-Mo(2)-N(4) | 90.94(10)  |
| N(4)-Mo(1)-N(1) | 71.71(9)   | C(4)-Mo(2)-N(4) | 94.79(11)  |
| C(6)-Mo(1)-N(1) | 92.57(11)  | C(3)-Mo(2)-C(9) | 103.73(13) |
| N(8)-Mo(1)-N(1) | 79.61(8)   | C(4)-Mo(2)-C(9) | 104.57(13) |
| C(1)-Mo(1)-C(7) | 112.37(12) | N(4)-Mo(2)-C(9) | 157.15(11) |
| C(2)-Mo(1)-C(7) | 72.82(12)  | C(3)-Mo(2)-N(9) | 98.52(10)  |
| N(4)-Mo(1)-C(7) | 148.86(10) | C(4)-Mo(2)-N(9) | 171.13(11) |

|                  |            |                   |           |
|------------------|------------|-------------------|-----------|
| N(4)-Mo(2)-N(9)  | 76.34(8)   | O(6)-N(11)-O(5)   | 123.8(3)  |
| C(9)-Mo(2)-N(9)  | 84.14(11)  | O(6)-N(11)-C(15)  | 118.5(3)  |
| C(3)-Mo(2)-N(1)  | 162.40(10) | O(5)-N(11)-C(15)  | 117.7(3)  |
| C(4)-Mo(2)-N(1)  | 96.72(10)  | O(1)-C(1)-Mo(1)   | 177.0(3)  |
| N(4)-Mo(2)-N(1)  | 71.74(9)   | O(2)-C(2)-Mo(1)   | 176.2(3)  |
| C(9)-Mo(2)-N(1)  | 93.72(11)  | O(3)-C(3)-Mo(2)   | 176.9(3)  |
| N(9)-Mo(2)-N(1)  | 80.77(8)   | O(4)-C(4)-Mo(2)   | 177.4(2)  |
| C(3)-Mo(2)-C(8)  | 68.70(13)  | C(6)-C(5)-Mo(1)   | 67.25(16) |
| C(4)-Mo(2)-C(8)  | 106.18(12) | C(7)-C(6)-C(5)    | 116.4(3)  |
| N(4)-Mo(2)-C(8)  | 147.52(11) | C(7)-C(6)-Mo(1)   | 76.46(17) |
| C(9)-Mo(2)-C(8)  | 35.96(12)  | C(5)-C(6)-Mo(1)   | 76.86(18) |
| N(9)-Mo(2)-C(8)  | 81.83(10)  | C(6)-C(7)-Mo(1)   | 67.57(16) |
| N(1)-Mo(2)-C(8)  | 128.10(11) | C(9)-C(8)-Mo(2)   | 67.67(18) |
| C(3)-Mo(2)-C(10) | 112.01(12) | C(8)-C(9)-C(10)   | 116.3(3)  |
| C(4)-Mo(2)-C(10) | 71.47(13)  | C(8)-C(9)-Mo(2)   | 76.4(2)   |
| N(4)-Mo(2)-C(10) | 150.24(11) | C(10)-C(9)-Mo(2)  | 76.55(19) |
| C(9)-Mo(2)-C(10) | 36.17(12)  | C(9)-C(10)-Mo(2)  | 67.28(17) |
| N(9)-Mo(2)-C(10) | 116.44(11) | N(7)-C(11)-N(10)  | 112.7(2)  |
| N(1)-Mo(2)-C(10) | 83.51(10)  | N(7)-C(11)-C(12)  | 123.7(3)  |
| C(8)-Mo(2)-C(10) | 61.92(12)  | N(10)-C(11)-C(12) | 123.3(3)  |
| N(2)-N(1)-Mo(2)  | 117.61(19) | C(13)-C(12)-C(17) | 119.9(3)  |
| N(2)-N(1)-Mo(1)  | 117.62(19) | C(13)-C(12)-C(11) | 119.7(3)  |
| Mo(2)-N(1)-Mo(1) | 99.40(9)   | C(17)-C(12)-C(11) | 120.3(3)  |
| N(3)-N(2)-N(1)   | 179.0(3)   | C(14)-C(13)-C(12) | 120.0(3)  |
| N(5)-N(4)-Mo(1)  | 126.70(19) | C(15)-C(14)-C(13) | 118.9(3)  |
| N(5)-N(4)-Mo(2)  | 124.70(18) | C(14)-C(15)-C(16) | 122.6(3)  |
| Mo(1)-N(4)-Mo(2) | 106.92(10) | C(14)-C(15)-N(11) | 118.4(3)  |
| N(6)-N(5)-N(4)   | 179.2(3)   | C(16)-C(15)-N(11) | 119.0(3)  |
| N(8)-N(7)-C(11)  | 103.8(2)   | C(17)-C(16)-C(15) | 118.1(3)  |
| N(9)-N(8)-N(7)   | 109.7(2)   | C(16)-C(17)-C(12) | 120.5(3)  |
| N(9)-N(8)-Mo(1)  | 119.00(17) | C(18)-N(12)-C(19) | 110.4(3)  |
| N(7)-N(8)-Mo(1)  | 130.25(17) | C(18)-N(12)-C(20) | 108.9(3)  |
| N(10)-N(9)-N(8)  | 109.7(2)   | C(19)-N(12)-C(20) | 109.1(2)  |
| N(10)-N(9)-Mo(2) | 131.26(18) | C(18)-N(12)-C(21) | 109.3(3)  |
| N(8)-N(9)-Mo(2)  | 118.84(17) | C(19)-N(12)-C(21) | 109.7(3)  |
| N(9)-N(10)-C(11) | 104.1(2)   | C(20)-N(12)-C(21) | 109.4(3)  |

---

Symmetry transformations used to generate equivalent atoms:

Table S7. Crystal data and structure refinement for  $[\text{N}(\text{CH}_3)_4][(\mu\text{-N}_4\text{C}\{\text{C}(\text{CN})=\text{C}(\text{CN})_2\}-\kappa^2\text{N}^2:\text{N}^3)_2(\mu_{1,1}\text{-N}_3)\{\text{Mo}(\eta^3\text{-C}_3\text{H}_5)(\text{CO})_2\}_2]\cdot\text{CH}_2\text{Cl}_2$

|                                       |                                                                           |                               |
|---------------------------------------|---------------------------------------------------------------------------|-------------------------------|
| Empirical formula                     | $\text{C}_{27}\text{H}_{24}\text{Cl}_2\text{Mo}_2\text{N}_{18}\text{O}_4$ |                               |
| Formula weight                        | 927.42                                                                    |                               |
| Temperature                           | 150(2) K                                                                  |                               |
| Wavelength                            | 0.71073 Å                                                                 |                               |
| Crystal system                        | Monoclinic                                                                |                               |
| Space group                           | $P2(1)/n$                                                                 |                               |
| Unit cell dimensions                  | $a = 11.2316(4)$ Å                                                        | $\alpha = 90^\circ$ .         |
|                                       | $b = 11.6355(4)$ Å                                                        | $\beta = 98.1264(15)^\circ$ . |
|                                       | $c = 28.9416(10)$ Å                                                       | $\gamma = 90^\circ$ .         |
| Volume                                | $3744.3(2)$ Å <sup>3</sup>                                                |                               |
| Z                                     | 4                                                                         |                               |
| Density (calculated)                  | $1.645$ Mg/m <sup>3</sup>                                                 |                               |
| Absorption coefficient                | $0.872$ mm <sup>-1</sup>                                                  |                               |
| F(000)                                | 1848                                                                      |                               |
| Crystal size                          | $0.50 \times 0.30 \times 0.03$ mm <sup>3</sup>                            |                               |
| Theta range for data collection       | $1.42$ to $27.50^\circ$ .                                                 |                               |
| Index ranges                          | $-14 \leq h \leq 14$ , $-15 \leq k \leq 14$ , $-37 \leq l \leq 37$        |                               |
| Reflections collected                 | 24484                                                                     |                               |
| Independent reflections               | 8543 [R(int) = 0.0580]                                                    |                               |
| Completeness to theta = $27.50^\circ$ | 99.4 %                                                                    |                               |
| Absorption correction                 | Semi-empirical from equivalents                                           |                               |
| Max. and min. transmission            | 0.990 and 0.750                                                           |                               |
| Refinement method                     | Full-matrix least-squares on F <sup>2</sup>                               |                               |
| Data / restraints / parameters        | 8543 / 0 / 482                                                            |                               |
| Goodness-of-fit on F <sup>2</sup>     | 1.028                                                                     |                               |
| Final R indices [I > 2sigma(I)]       | R1 = 0.0486, wR2 = 0.1148                                                 |                               |
| R indices (all data)                  | R1 = 0.0964, wR2 = 0.1337                                                 |                               |
| Largest diff. peak and hole           | $1.204$ and $-1.324$ e.Å <sup>-3</sup>                                    |                               |

Table S8. Bond lengths [Å] and angles [°] for  $[\text{N}(\text{CH}_3)_4][(\mu\text{-N}_4\text{C}\{\text{C}(\text{CN})=\text{C}(\text{CN})_2\}-\kappa^2\text{N}^2:\text{N}^3)_2(\mu_{1,1}\text{-N}_3)\{\text{Mo}(\eta^3\text{-C}_3\text{H}_5)(\text{CO})_2\}_2]\cdot\text{CH}_2\text{Cl}_2$

|                  |            |                  |            |
|------------------|------------|------------------|------------|
| Mo(1)-C(1)       | 1.937(5)   | N(13)-N(14)      | 1.329(4)   |
| Mo(1)-C(2)       | 1.943(5)   | N(14)-C(17)      | 1.346(5)   |
| Mo(1)-N(1)       | 2.197(3)   | N(15)-C(20)      | 1.139(6)   |
| Mo(1)-C(6)       | 2.198(4)   | N(16)-C(21)      | 1.129(5)   |
| Mo(1)-N(5)       | 2.260(3)   | N(17)-C(22)      | 1.136(6)   |
| Mo(1)-N(12)      | 2.279(3)   | C(1)-O(1)        | 1.161(5)   |
| Mo(1)-C(7)       | 2.311(4)   | C(2)-O(2)        | 1.151(5)   |
| Mo(1)-C(5)       | 2.326(5)   | C(3)-O(3)        | 1.155(5)   |
| Mo(2)-C(4)       | 1.937(5)   | C(4)-O(4)        | 1.159(5)   |
| Mo(2)-C(3)       | 1.945(4)   | C(5)-C(6)        | 1.369(7)   |
| Mo(2)-N(1)       | 2.184(3)   | C(6)-C(7)        | 1.427(7)   |
| Mo(2)-C(9)       | 2.210(4)   | C(8)-C(9)        | 1.417(7)   |
| Mo(2)-N(6)       | 2.276(3)   | C(9)-C(10)       | 1.393(8)   |
| Mo(2)-N(13)      | 2.290(3)   | C(11)-C(12)      | 1.453(5)   |
| Mo(2)-C(8)       | 2.325(4)   | C(12)-C(13)      | 1.350(6)   |
| Mo(2)-C(10)      | 2.342(5)   | C(12)-C(14)      | 1.465(6)   |
| N(1)-N(2)        | 1.225(4)   | C(13)-C(16)      | 1.427(6)   |
| N(2)-N(3)        | 1.141(5)   | C(13)-C(15)      | 1.449(6)   |
| N(4)-N(5)        | 1.328(4)   | C(17)-C(18)      | 1.463(5)   |
| N(4)-C(11)       | 1.334(5)   | C(18)-C(19)      | 1.352(6)   |
| N(5)-N(6)        | 1.354(4)   | C(18)-C(20)      | 1.445(6)   |
| N(6)-N(7)        | 1.332(4)   | C(19)-C(22)      | 1.434(6)   |
| N(7)-C(11)       | 1.336(5)   | C(19)-C(21)      | 1.465(6)   |
| N(8)-C(14)       | 1.124(5)   | N(18)-C(25)      | 1.479(6)   |
| N(9)-C(15)       | 1.144(6)   | N(18)-C(26)      | 1.484(6)   |
| N(10)-C(16)      | 1.138(6)   | N(18)-C(23)      | 1.490(6)   |
| N(11)-N(12)      | 1.319(4)   | N(18)-C(24)      | 1.492(6)   |
| N(11)-C(17)      | 1.322(5)   | C(27)-Cl(1)      | 1.743(5)   |
| N(12)-N(13)      | 1.345(5)   | C(27)-Cl(2)      | 1.766(5)   |
| C(1)-Mo(1)-C(2)  | 78.73(19)  | C(2)-Mo(1)-N(12) | 100.03(16) |
| C(1)-Mo(1)-N(1)  | 93.48(16)  | N(1)-Mo(1)-N(12) | 78.03(12)  |
| C(2)-Mo(1)-N(1)  | 88.73(17)  | C(6)-Mo(1)-N(12) | 84.93(17)  |
| C(1)-Mo(1)-C(6)  | 103.6(2)   | N(5)-Mo(1)-N(12) | 79.55(12)  |
| C(2)-Mo(1)-C(6)  | 103.2(2)   | C(1)-Mo(1)-C(7)  | 104.64(18) |
| N(1)-Mo(1)-C(6)  | 160.72(15) | C(2)-Mo(1)-C(7)  | 67.6(2)    |
| C(1)-Mo(1)-N(5)  | 99.58(15)  | N(1)-Mo(1)-C(7)  | 146.08(17) |
| C(2)-Mo(1)-N(5)  | 166.02(17) | C(6)-Mo(1)-C(7)  | 36.80(19)  |
| N(1)-Mo(1)-N(5)  | 77.47(12)  | N(5)-Mo(1)-C(7)  | 125.78(17) |
| C(6)-Mo(1)-N(5)  | 90.73(17)  | N(12)-Mo(1)-C(7) | 82.44(15)  |
| C(1)-Mo(1)-N(12) | 171.47(16) | C(1)-Mo(1)-C(5)  | 71.6(2)    |

|                   |            |                   |          |
|-------------------|------------|-------------------|----------|
| C(2)-Mo(1)-C(5)   | 109.91(19) | N(12)-N(11)-C(17) | 104.2(3) |
| N(1)-Mo(1)-C(5)   | 152.48(16) | N(11)-N(12)-N(13) | 109.6(3) |
| C(6)-Mo(1)-C(5)   | 35.09(19)  | N(11)-N(12)-Mo(1) | 126.7(3) |
| N(5)-Mo(1)-C(5)   | 82.30(15)  | N(13)-N(12)-Mo(1) | 123.2(2) |
| N(12)-Mo(1)-C(5)  | 116.50(16) | N(14)-N(13)-N(12) | 109.6(3) |
| C(7)-Mo(1)-C(5)   | 61.44(19)  | N(14)-N(13)-Mo(2) | 128.2(3) |
| C(4)-Mo(2)-C(3)   | 76.77(18)  | N(12)-N(13)-Mo(2) | 122.1(2) |
| C(4)-Mo(2)-N(1)   | 91.43(17)  | N(13)-N(14)-C(17) | 103.1(3) |
| C(3)-Mo(2)-N(1)   | 93.36(14)  | O(1)-C(1)-Mo(1)   | 176.0(4) |
| C(4)-Mo(2)-C(9)   | 103.8(2)   | O(2)-C(2)-Mo(1)   | 175.7(4) |
| C(3)-Mo(2)-C(9)   | 102.82(18) | O(3)-C(3)-Mo(2)   | 174.3(4) |
| N(1)-Mo(2)-C(9)   | 159.82(16) | O(4)-C(4)-Mo(2)   | 174.7(4) |
| C(4)-Mo(2)-N(6)   | 166.81(17) | C(6)-C(5)-Mo(1)   | 67.3(3)  |
| C(3)-Mo(2)-N(6)   | 98.09(14)  | C(5)-C(6)-C(7)    | 115.8(5) |
| N(1)-Mo(2)-N(6)   | 76.63(12)  | C(5)-C(6)-Mo(1)   | 77.6(3)  |
| C(9)-Mo(2)-N(6)   | 89.08(17)  | C(7)-C(6)-Mo(1)   | 75.9(3)  |
| C(4)-Mo(2)-N(13)  | 100.96(16) | C(6)-C(7)-Mo(1)   | 67.3(3)  |
| C(3)-Mo(2)-N(13)  | 170.06(14) | C(9)-C(8)-Mo(2)   | 67.4(3)  |
| N(1)-Mo(2)-N(13)  | 76.95(12)  | C(10)-C(9)-C(8)   | 115.9(5) |
| C(9)-Mo(2)-N(13)  | 87.12(16)  | C(10)-C(9)-Mo(2)  | 77.4(3)  |
| N(6)-Mo(2)-N(13)  | 81.99(12)  | C(8)-C(9)-Mo(2)   | 76.3(3)  |
| C(4)-Mo(2)-C(8)   | 106.96(18) | C(9)-C(10)-Mo(2)  | 67.1(3)  |
| C(3)-Mo(2)-C(8)   | 68.79(18)  | N(4)-C(11)-N(7)   | 113.3(3) |
| N(1)-Mo(2)-C(8)   | 149.81(15) | N(4)-C(11)-C(12)  | 121.4(4) |
| C(9)-Mo(2)-C(8)   | 36.31(18)  | N(7)-C(11)-C(12)  | 125.2(4) |
| N(6)-Mo(2)-C(8)   | 81.89(14)  | C(13)-C(12)-C(11) | 125.6(4) |
| N(13)-Mo(2)-C(8)  | 120.90(15) | C(13)-C(12)-C(14) | 119.7(4) |
| C(4)-Mo(2)-C(10)  | 70.7(2)    | C(11)-C(12)-C(14) | 114.7(4) |
| C(3)-Mo(2)-C(10)  | 106.42(17) | C(12)-C(13)-C(16) | 124.1(4) |
| N(1)-Mo(2)-C(10)  | 148.81(16) | C(12)-C(13)-C(15) | 119.7(4) |
| C(9)-Mo(2)-C(10)  | 35.49(19)  | C(16)-C(13)-C(15) | 116.2(4) |
| N(6)-Mo(2)-C(10)  | 122.52(17) | N(8)-C(14)-C(12)  | 178.3(5) |
| N(13)-Mo(2)-C(10) | 81.57(15)  | N(9)-C(15)-C(13)  | 179.2(6) |
| C(8)-Mo(2)-C(10)  | 61.37(18)  | N(10)-C(16)-C(13) | 174.7(5) |
| N(2)-N(1)-Mo(2)   | 117.9(3)   | N(11)-C(17)-N(14) | 113.6(3) |
| N(2)-N(1)-Mo(1)   | 119.7(3)   | N(11)-C(17)-C(18) | 121.0(4) |
| Mo(2)-N(1)-Mo(1)  | 122.02(14) | N(14)-C(17)-C(18) | 125.3(4) |
| N(3)-N(2)-N(1)    | 179.6(5)   | C(19)-C(18)-C(20) | 119.3(4) |
| N(5)-N(4)-C(11)   | 104.2(3)   | C(19)-C(18)-C(17) | 124.2(4) |
| N(4)-N(5)-N(6)    | 109.3(3)   | C(20)-C(18)-C(17) | 116.4(4) |
| N(4)-N(5)-Mo(1)   | 128.5(2)   | C(18)-C(19)-C(22) | 123.1(4) |
| N(6)-N(5)-Mo(1)   | 122.2(2)   | C(18)-C(19)-C(21) | 120.1(4) |
| N(7)-N(6)-N(5)    | 109.2(3)   | C(22)-C(19)-C(21) | 116.7(4) |
| N(7)-N(6)-Mo(2)   | 126.7(2)   | N(15)-C(20)-C(18) | 177.5(5) |
| N(5)-N(6)-Mo(2)   | 124.0(2)   | N(16)-C(21)-C(19) | 176.7(5) |
| N(6)-N(7)-C(11)   | 104.0(3)   | N(17)-C(22)-C(19) | 177.3(5) |

|                   |          |                   |          |
|-------------------|----------|-------------------|----------|
| C(25)-N(18)-C(26) | 108.2(4) | C(26)-N(18)-C(24) | 109.1(4) |
| C(25)-N(18)-C(23) | 109.2(4) | C(23)-N(18)-C(24) | 110.8(4) |
| C(26)-N(18)-C(23) | 109.8(4) | Cl(1)-C(27)-Cl(2) | 108.3(3) |
| C(25)-N(18)-C(24) | 109.7(4) |                   |          |

---

Symmetry transformations used to generate equivalent atoms:



Table S9. Crystal data and structure refinement for  $[\text{N}(\text{CH}_3)_4][(\mu\text{-N}_4\text{C}\{\text{C}_6\text{H}_4\text{NO}_2\}\text{-}\kappa^2\text{N}^2:\text{N}^3)_2(\mu_{1,1}\text{-N}_3)\{\text{Mo}(\eta^3\text{-C}_3\text{H}_5)(\text{CO})_2\}_2]\cdot(\text{THF})$

---

|                                   |                                                                |                                |
|-----------------------------------|----------------------------------------------------------------|--------------------------------|
| Empirical formula                 | $\text{C}_{32}\text{H}_{38}\text{Mo}_2\text{N}_{14}\text{O}_9$ |                                |
| Formula weight                    | 954.64                                                         |                                |
| Temperature                       | 150(2) K                                                       |                                |
| Wavelength                        | 0.71073 Å                                                      |                                |
| Crystal system                    | Triclinic                                                      |                                |
| Space group                       | P-1                                                            |                                |
| Unit cell dimensions              | $a = 12.3540(6)$ Å                                             | $\alpha = 66.3975(12)^\circ$ . |
|                                   | $b = 12.9495(7)$ Å                                             | $\beta = 70.1697(10)^\circ$ .  |
|                                   | $c = 14.5236(7)$ Å                                             | $\gamma = 77.6550(11)^\circ$ . |
| Volume                            | 1994.63(17) Å <sup>3</sup>                                     |                                |
| Z                                 | 2                                                              |                                |
| Density (calculated)              | 1.589 Mg/m <sup>3</sup>                                        |                                |
| Absorption coefficient            | 0.698 mm <sup>-1</sup>                                         |                                |
| F(000)                            | 968                                                            |                                |
| Crystal size                      | 0.28 x 0.15 x 0.15 mm <sup>3</sup>                             |                                |
| Theta range for data collection   | 1.76 to 27.50°.                                                |                                |
| Index ranges                      | -16 ≤ h ≤ 16, -16 ≤ k ≤ 16, -18 ≤ l ≤ 18                       |                                |
| Reflections collected             | 26034                                                          |                                |
| Independent reflections           | 9151 [R(int) = 0.0489]                                         |                                |
| Completeness to theta = 27.50°    | 99.8 %                                                         |                                |
| Absorption correction             | Semi-empirical from equivalents                                |                                |
| Max. and min. transmission        | 0.9026 and 0.8286                                              |                                |
| Refinement method                 | Full-matrix least-squares on F <sup>2</sup>                    |                                |
| Data / restraints / parameters    | 9151 / 17 / 509                                                |                                |
| Goodness-of-fit on F <sup>2</sup> | 1.099                                                          |                                |
| Final R indices [I > 2σ(I)]       | R1 = 0.0581, wR2 = 0.1361                                      |                                |
| R indices (all data)              | R1 = 0.0769, wR2 = 0.1456                                      |                                |
| Largest diff. peak and hole       | 1.551 and -0.699 e.Å <sup>-3</sup>                             |                                |

---

Table S10. Bond lengths [Å] and angles [°] for [N(CH<sub>3</sub>)<sub>4</sub>][( $\mu$ -N<sub>4</sub>C{C<sub>6</sub>H<sub>4</sub>NO<sub>2</sub>}- $\kappa^2$ N<sup>2</sup>:N<sup>3</sup>)<sub>2</sub>( $\mu_{1,1}$ -N<sub>3</sub>){Mo( $\eta^3$ -C<sub>3</sub>H<sub>5</sub>)(CO)<sub>2</sub>]<sub>2</sub>·(THF)

|                 |            |                  |            |
|-----------------|------------|------------------|------------|
| Mo(1)-C(1)      | 1.951(5)   | N(13')-C(22)     | 1.502(19)  |
| Mo(1)-C(2)      | 1.955(5)   | O(1)-C(1)        | 1.151(6)   |
| Mo(1)-C(6)      | 2.196(5)   | O(2)-C(2)        | 1.152(6)   |
| Mo(1)-N(5)      | 2.197(4)   | O(3)-C(3)        | 1.156(6)   |
| Mo(1)-N(1)      | 2.246(4)   | O(4)-C(4)        | 1.149(7)   |
| Mo(1)-N(11)     | 2.264(3)   | C(5)-C(6)        | 1.403(7)   |
| Mo(1)-C(7)      | 2.315(5)   | C(6)-C(7)        | 1.407(7)   |
| Mo(1)-C(5)      | 2.315(5)   | C(8)-C(9)        | 1.403(8)   |
| Mo(2)-C(3)      | 1.949(6)   | C(9)-C(10)       | 1.402(8)   |
| Mo(2)-C(4)      | 1.950(6)   | C(11)-C(12)      | 1.466(6)   |
| Mo(2)-N(6)      | 2.201(4)   | C(12)-C(17)      | 1.390(6)   |
| Mo(2)-C(9)      | 2.204(5)   | C(12)-C(13)      | 1.396(6)   |
| Mo(2)-N(10)     | 2.249(4)   | C(13)-C(14)      | 1.382(6)   |
| Mo(2)-N(1)      | 2.255(4)   | C(14)-C(15)      | 1.376(6)   |
| Mo(2)-C(10)     | 2.302(5)   | C(15)-C(16)      | 1.379(6)   |
| Mo(2)-C(8)      | 2.314(6)   | C(16)-C(17)      | 1.379(6)   |
| N(1)-N(2)       | 1.204(5)   | C(18)-C(19)      | 1.472(6)   |
| N(2)-N(3)       | 1.145(6)   | C(19)-C(24)      | 1.372(7)   |
| N(4)-N(5)       | 1.342(5)   | C(19)-C(20)      | 1.393(7)   |
| N(4)-C(11)      | 1.343(5)   | C(20)-C(21)      | 1.391(7)   |
| N(5)-N(6)       | 1.335(5)   | C(21)-C(22)      | 1.346(9)   |
| N(6)-N(7)       | 1.326(5)   | C(22)-C(23)      | 1.397(9)   |
| N(7)-C(11)      | 1.321(6)   | C(23)-C(24)      | 1.384(7)   |
| N(8)-O(5)       | 1.210(5)   | N(14)-C(28')     | 1.40(3)    |
| N(8)-O(6)       | 1.228(5)   | N(14)-C(27)      | 1.442(9)   |
| N(8)-C(15)      | 1.473(6)   | N(14)-C(26')     | 1.45(3)    |
| N(9)-N(10)      | 1.333(5)   | N(14)-C(28)      | 1.469(9)   |
| N(9)-C(18)      | 1.338(6)   | N(14)-C(25)      | 1.487(6)   |
| N(10)-N(11)     | 1.332(5)   | N(14)-C(26)      | 1.545(10)  |
| N(11)-N(12)     | 1.329(5)   | N(14)-C(27')     | 1.61(3)    |
| N(12)-C(18)     | 1.340(6)   | O(9)-C(29)       | 1.497(13)  |
| N(13)-O(7)      | 1.21(3)    | O(9)-C(32)       | 1.540(13)  |
| N(13)-O(8)      | 1.243(18)  | C(29)-C(30)      | 1.361(15)  |
| N(13)-C(22)     | 1.498(16)  | C(30)-C(31)      | 1.482(15)  |
| N(13')-O(7')    | 1.18(4)    | C(31)-C(32)      | 1.503(14)  |
| N(13')-O(8')    | 1.25(2)    |                  |            |
| C(1)-Mo(1)-C(2) | 79.8(2)    | C(1)-Mo(1)-N(1)  | 164.97(17) |
| C(1)-Mo(1)-C(6) | 102.6(2)   | C(2)-Mo(1)-N(1)  | 95.27(19)  |
| C(2)-Mo(1)-C(6) | 104.5(2)   | C(6)-Mo(1)-N(1)  | 92.39(17)  |
| C(1)-Mo(1)-N(5) | 88.25(16)  | N(5)-Mo(1)-N(1)  | 77.60(13)  |
| C(2)-Mo(1)-N(5) | 91.39(18)  | C(1)-Mo(1)-N(11) | 102.11(17) |
| C(6)-Mo(1)-N(5) | 161.99(17) | C(2)-Mo(1)-N(11) | 169.75(17) |

|                   |            |                    |            |
|-------------------|------------|--------------------|------------|
| C(6)-Mo(1)-N(11)  | 84.96(17)  | Mo(1)-N(1)-Mo(2)   | 116.01(16) |
| N(5)-Mo(1)-N(11)  | 78.66(13)  | N(3)-N(2)-N(1)     | 178.6(5)   |
| N(1)-Mo(1)-N(11)  | 80.28(13)  | N(5)-N(4)-C(11)    | 103.7(3)   |
| C(1)-Mo(1)-C(7)   | 68.21(19)  | N(6)-N(5)-N(4)     | 109.1(3)   |
| C(2)-Mo(1)-C(7)   | 108.3(2)   | N(6)-N(5)-Mo(1)    | 124.8(3)   |
| C(6)-Mo(1)-C(7)   | 36.24(19)  | N(4)-N(5)-Mo(1)    | 125.9(3)   |
| N(5)-Mo(1)-C(7)   | 145.21(16) | N(7)-N(6)-N(5)     | 109.6(3)   |
| N(1)-Mo(1)-C(7)   | 126.71(16) | N(7)-N(6)-Mo(2)    | 126.6(3)   |
| N(11)-Mo(1)-C(7)  | 81.63(15)  | N(5)-N(6)-Mo(2)    | 123.9(3)   |
| C(1)-Mo(1)-C(5)   | 107.57(19) | C(11)-N(7)-N(6)    | 104.8(4)   |
| C(2)-Mo(1)-C(5)   | 70.5(2)    | O(5)-N(8)-O(6)     | 123.3(4)   |
| C(6)-Mo(1)-C(5)   | 36.12(19)  | O(5)-N(8)-C(15)    | 118.4(4)   |
| N(5)-Mo(1)-C(5)   | 152.75(17) | O(6)-N(8)-C(15)    | 118.3(4)   |
| N(1)-Mo(1)-C(5)   | 83.77(17)  | N(10)-N(9)-C(18)   | 104.1(3)   |
| N(11)-Mo(1)-C(5)  | 117.75(17) | N(11)-N(10)-N(9)   | 109.6(3)   |
| C(7)-Mo(1)-C(5)   | 61.91(18)  | N(11)-N(10)-Mo(2)  | 123.3(3)   |
| C(3)-Mo(2)-C(4)   | 81.6(3)    | N(9)-N(10)-Mo(2)   | 126.4(3)   |
| C(3)-Mo(2)-N(6)   | 87.92(18)  | N(12)-N(11)-N(10)  | 109.6(3)   |
| C(4)-Mo(2)-N(6)   | 89.6(2)    | N(12)-N(11)-Mo(1)  | 126.4(3)   |
| C(3)-Mo(2)-C(9)   | 104.4(2)   | N(10)-N(11)-Mo(1)  | 123.5(3)   |
| C(4)-Mo(2)-C(9)   | 104.8(2)   | N(11)-N(12)-C(18)  | 104.3(3)   |
| N(6)-Mo(2)-C(9)   | 162.08(18) | O(7)-N(13)-O(8)    | 124(2)     |
| C(3)-Mo(2)-N(10)  | 165.85(19) | O(7)-N(13)-C(22)   | 110.9(19)  |
| C(4)-Mo(2)-N(10)  | 94.8(2)    | O(8)-N(13)-C(22)   | 124.7(12)  |
| N(6)-Mo(2)-N(10)  | 78.32(13)  | O(7')-N(13')-O(8') | 124(3)     |
| C(9)-Mo(2)-N(10)  | 89.74(17)  | O(7')-N(13')-C(22) | 129(2)     |
| C(3)-Mo(2)-N(1)   | 100.0(2)   | O(8')-N(13')-C(22) | 106.7(16)  |
| C(4)-Mo(2)-N(1)   | 167.6(2)   | O(1)-C(1)-Mo(1)    | 176.2(4)   |
| N(6)-Mo(2)-N(1)   | 78.15(14)  | O(2)-C(2)-Mo(1)    | 178.6(5)   |
| C(9)-Mo(2)-N(1)   | 86.80(19)  | O(3)-C(3)-Mo(2)    | 177.2(6)   |
| N(10)-Mo(2)-N(1)  | 80.52(13)  | O(4)-C(4)-Mo(2)    | 178.4(6)   |
| C(3)-Mo(2)-C(10)  | 110.0(2)   | C(6)-C(5)-Mo(1)    | 67.3(3)    |
| C(4)-Mo(2)-C(10)  | 70.6(2)    | C(5)-C(6)-C(7)     | 115.8(5)   |
| N(6)-Mo(2)-C(10)  | 150.3(2)   | C(5)-C(6)-Mo(1)    | 76.6(3)    |
| C(9)-Mo(2)-C(10)  | 36.2(2)    | C(7)-C(6)-Mo(1)    | 76.5(3)    |
| N(10)-Mo(2)-C(10) | 81.39(18)  | C(6)-C(7)-Mo(1)    | 67.3(3)    |
| N(1)-Mo(2)-C(10)  | 119.61(19) | C(9)-C(8)-Mo(2)    | 67.7(3)    |
| C(3)-Mo(2)-C(8)   | 69.8(2)    | C(10)-C(9)-C(8)    | 115.1(6)   |
| C(4)-Mo(2)-C(8)   | 108.7(2)   | C(10)-C(9)-Mo(2)   | 75.7(3)    |
| N(6)-Mo(2)-C(8)   | 147.95(19) | C(8)-C(9)-Mo(2)    | 76.2(3)    |
| C(9)-Mo(2)-C(8)   | 36.07(19)  | C(9)-C(10)-Mo(2)   | 68.1(3)    |
| N(10)-Mo(2)-C(8)  | 124.10(17) | N(7)-C(11)-N(4)    | 112.7(4)   |
| N(1)-Mo(2)-C(8)   | 83.3(2)    | N(7)-C(11)-C(12)   | 123.7(4)   |
| C(10)-Mo(2)-C(8)  | 61.7(2)    | N(4)-C(11)-C(12)   | 123.5(4)   |
| N(2)-N(1)-Mo(1)   | 118.4(3)   | C(17)-C(12)-C(13)  | 119.5(4)   |
| N(2)-N(1)-Mo(2)   | 121.8(3)   | C(17)-C(12)-C(11)  | 122.0(4)   |

|                    |           |                     |           |
|--------------------|-----------|---------------------|-----------|
| C(13)-C(12)-C(11)  | 118.5(4)  | C(28')-N(14)-C(26') | 105.5(17) |
| C(14)-C(13)-C(12)  | 120.3(4)  | C(27)-N(14)-C(26')  | 60.4(13)  |
| C(15)-C(14)-C(13)  | 118.6(4)  | C(28')-N(14)-C(28)  | 50.2(12)  |
| C(14)-C(15)-C(16)  | 122.4(4)  | C(27)-N(14)-C(28)   | 113.1(7)  |
| C(14)-C(15)-N(8)   | 118.4(4)  | C(26')-N(14)-C(28)  | 138.1(12) |
| C(16)-C(15)-N(8)   | 119.2(4)  | C(28')-N(14)-C(25)  | 109.5(11) |
| C(17)-C(16)-C(15)  | 118.6(4)  | C(27)-N(14)-C(25)   | 110.5(5)  |
| C(16)-C(17)-C(12)  | 120.5(4)  | C(26')-N(14)-C(25)  | 109.4(12) |
| N(9)-C(18)-N(12)   | 112.4(4)  | C(28)-N(14)-C(25)   | 111.1(5)  |
| N(9)-C(18)-C(19)   | 124.3(4)  | C(28')-N(14)-C(26)  | 59.8(12)  |
| N(12)-C(18)-C(19)  | 123.3(4)  | C(27)-N(14)-C(26)   | 105.7(6)  |
| C(24)-C(19)-C(20)  | 120.3(5)  | C(26')-N(14)-C(26)  | 48.2(12)  |
| C(24)-C(19)-C(18)  | 120.8(4)  | C(28)-N(14)-C(26)   | 106.7(7)  |
| C(20)-C(19)-C(18)  | 118.9(4)  | C(25)-N(14)-C(26)   | 109.5(5)  |
| C(21)-C(20)-C(19)  | 119.0(5)  | C(28')-N(14)-C(27') | 120.5(15) |
| C(22)-C(21)-C(20)  | 119.3(6)  | C(27)-N(14)-C(27')  | 45.6(9)   |
| C(21)-C(22)-C(23)  | 123.4(5)  | C(26')-N(14)-C(27') | 104.8(16) |
| C(21)-C(22)-N(13)  | 109.6(8)  | C(28)-N(14)-C(27')  | 73.4(10)  |
| C(23)-C(22)-N(13)  | 127.1(8)  | C(25)-N(14)-C(27')  | 106.7(9)  |
| C(21)-C(22)-N(13') | 131.4(9)  | C(26)-N(14)-C(27')  | 140.5(10) |
| C(23)-C(22)-N(13') | 105.2(9)  | C(29)-O(9)-C(32)    | 105.6(11) |
| N(13)-C(22)-N(13') | 22.0(7)   | C(30)-C(29)-O(9)    | 92.5(14)  |
| C(24)-C(23)-C(22)  | 116.6(6)  | C(29)-C(30)-C(31)   | 102.6(17) |
| C(19)-C(24)-C(23)  | 121.4(6)  | C(30)-C(31)-C(32)   | 103.4(15) |
| C(28')-N(14)-C(27) | 140.0(12) | C(31)-C(32)-O(9)    | 97.3(12)  |

---

Symmetry transformations used to generate equivalent atoms:

Table S11. Crystal data and structure refinement for  $[\text{N}(\text{CH}_3)_4][(\mu\text{-N}_3\text{C}_2\{\text{CO}_2\text{CH}_3\}_2\text{-}\kappa^2\text{N}^1:\text{N}^2)(\mu_{1,1}\text{-N}_3)_2\{\text{Mo}(\eta^3\text{-C}_3\text{H}_5)(\text{CO})_2\}_2]$

---

|                                   |                                                                |                                |
|-----------------------------------|----------------------------------------------------------------|--------------------------------|
| Empirical formula                 | $\text{C}_{20}\text{H}_{28}\text{Mo}_2\text{N}_{10}\text{O}_8$ |                                |
| Formula weight                    | 728.40                                                         |                                |
| Temperature                       | 150(2) K                                                       |                                |
| Wavelength                        | 0.71073 Å                                                      |                                |
| Crystal system                    | Triclinic                                                      |                                |
| Space group                       | P-1                                                            |                                |
| Unit cell dimensions              | $a = 10.3722(7)$ Å                                             | $\alpha = 79.3555(13)^\circ$ . |
|                                   | $b = 12.2607(8)$ Å                                             | $\beta = 68.3190(12)^\circ$ .  |
|                                   | $c = 13.1324(9)$ Å                                             | $\gamma = 69.1996(12)^\circ$ . |
| Volume                            | $1448.00(17)$ Å <sup>3</sup>                                   |                                |
| Z                                 | 2                                                              |                                |
| Density (calculated)              | 1.671 Mg/m <sup>3</sup>                                        |                                |
| Absorption coefficient            | 0.926 mm <sup>-1</sup>                                         |                                |
| F(000)                            | 732                                                            |                                |
| Crystal size                      | 0.38 x 0.35 x 0.30 mm <sup>3</sup>                             |                                |
| Theta range for data collection   | 1.67 to 27.50°.                                                |                                |
| Index ranges                      | -13 ≤ h ≤ 13, -15 ≤ k ≤ 15, -17 ≤ l ≤ 17                       |                                |
| Reflections collected             | 18748                                                          |                                |
| Independent reflections           | 6638 [R(int) = 0.0202]                                         |                                |
| Completeness to theta = 27.50°    | 99.7 %                                                         |                                |
| Absorption correction             | Semi-empirical from equivalents                                |                                |
| Max. and min. transmission        | 0.7686 and 0.7199                                              |                                |
| Refinement method                 | Full-matrix least-squares on F <sup>2</sup>                    |                                |
| Data / restraints / parameters    | 6638 / 0 / 367                                                 |                                |
| Goodness-of-fit on F <sup>2</sup> | 1.052                                                          |                                |
| Final R indices [I > 2σ(I)]       | R1 = 0.0218, wR2 = 0.0544                                      |                                |
| R indices (all data)              | R1 = 0.0246, wR2 = 0.0556                                      |                                |
| Largest diff. peak and hole       | 0.422 and -0.355 e.Å <sup>-3</sup>                             |                                |

---

Table S12. Bond lengths [Å] and angles [°] for  $[\text{N}(\text{CH}_3)_4][(\mu\text{-N}_3\text{C}_2\{\text{CO}_2\text{CH}_3\}_2\text{-}\kappa^2\text{N}^1:\text{N}^2)(\mu_{1,1}\text{-N}_3)_2\{\text{Mo}(\eta^3\text{-C}_3\text{H}_5)(\text{CO})_2\}_2]$

|                 |            |                 |           |
|-----------------|------------|-----------------|-----------|
| Mo(1)-C(1)      | 1.9455(19) | N(9)-C(12)      | 1.342(2)  |
| Mo(1)-C(2)      | 1.9548(19) | C(1)-O(1)       | 1.159(2)  |
| Mo(1)-C(6)      | 2.2020(18) | C(2)-O(2)       | 1.151(2)  |
| Mo(1)-N(7)      | 2.2180(14) | C(3)-O(3)       | 1.156(2)  |
| Mo(1)-N(4)      | 2.2598(15) | C(4)-O(4)       | 1.150(2)  |
| Mo(1)-N(1)      | 2.2962(15) | C(5)-C(6)       | 1.408(3)  |
| Mo(1)-C(7)      | 2.3058(18) | C(6)-C(7)       | 1.407(3)  |
| Mo(1)-C(5)      | 2.3194(19) | C(8)-C(9)       | 1.398(3)  |
| Mo(2)-C(3)      | 1.9382(19) | C(9)-C(10)      | 1.395(4)  |
| Mo(2)-C(4)      | 1.939(2)   | C(11)-C(12)     | 1.384(2)  |
| Mo(2)-N(8)      | 2.1733(14) | C(11)-C(13)     | 1.491(2)  |
| Mo(2)-C(9)      | 2.1941(19) | C(12)-C(15)     | 1.477(2)  |
| Mo(2)-N(4)      | 2.2726(15) | C(13)-O(5)      | 1.198(2)  |
| Mo(2)-N(1)      | 2.2828(15) | C(13)-O(6)      | 1.313(2)  |
| Mo(2)-C(10)     | 2.299(2)   | C(14)-O(6)      | 1.449(2)  |
| Mo(2)-C(8)      | 2.308(2)   | C(15)-O(7)      | 1.197(2)  |
| N(1)-N(2)       | 1.206(2)   | C(15)-O(8)      | 1.331(2)  |
| N(2)-N(3)       | 1.140(2)   | C(16)-O(8)      | 1.449(2)  |
| N(4)-N(5)       | 1.201(2)   | N(10)-C(19)     | 1.473(3)  |
| N(5)-N(6)       | 1.144(2)   | N(10)-C(20)     | 1.484(3)  |
| N(7)-C(11)      | 1.341(2)   | N(10)-C(17)     | 1.491(3)  |
| N(7)-N(8)       | 1.3576(19) | N(10)-C(18)     | 1.494(2)  |
| N(8)-N(9)       | 1.316(2)   |                 |           |
|                 |            |                 |           |
| C(1)-Mo(1)-C(2) | 79.96(8)   | N(7)-Mo(1)-C(7) | 149.60(6) |
| C(1)-Mo(1)-C(6) | 102.66(8)  | N(4)-Mo(1)-C(7) | 83.52(6)  |
| C(2)-Mo(1)-C(6) | 103.27(8)  | N(1)-Mo(1)-C(7) | 119.02(7) |
| C(1)-Mo(1)-N(7) | 91.50(6)   | C(1)-Mo(1)-C(5) | 68.25(8)  |
| C(2)-Mo(1)-N(7) | 92.12(6)   | C(2)-Mo(1)-C(5) | 106.90(8) |
| C(6)-Mo(1)-N(7) | 160.59(7)  | C(6)-Mo(1)-C(5) | 36.18(7)  |
| C(1)-Mo(1)-N(4) | 168.36(7)  | N(7)-Mo(1)-C(5) | 148.53(6) |
| C(2)-Mo(1)-N(4) | 101.90(7)  | N(4)-Mo(1)-C(5) | 121.33(7) |
| C(6)-Mo(1)-N(4) | 88.18(7)   | N(1)-Mo(1)-C(5) | 84.00(7)  |
| N(7)-Mo(1)-N(4) | 76.98(5)   | C(7)-Mo(1)-C(5) | 61.86(7)  |
| C(1)-Mo(1)-N(1) | 103.07(7)  | C(3)-Mo(2)-C(4) | 78.89(8)  |
| C(2)-Mo(1)-N(1) | 168.94(7)  | C(3)-Mo(2)-N(8) | 88.90(7)  |
| C(6)-Mo(1)-N(1) | 86.56(7)   | C(4)-Mo(2)-N(8) | 88.31(7)  |
| N(7)-Mo(1)-N(1) | 77.25(5)   | C(3)-Mo(2)-C(9) | 104.02(8) |
| N(4)-Mo(1)-N(1) | 73.01(5)   | C(4)-Mo(2)-C(9) | 104.75(9) |
| C(1)-Mo(1)-C(7) | 107.72(7)  | N(8)-Mo(2)-C(9) | 163.04(7) |
| C(2)-Mo(1)-C(7) | 69.20(7)   | C(3)-Mo(2)-N(4) | 166.59(7) |
| C(6)-Mo(1)-C(7) | 36.27(7)   | C(4)-Mo(2)-N(4) | 99.22(7)  |

|                  |            |                   |            |
|------------------|------------|-------------------|------------|
| N(8)-Mo(2)-N(4)  | 77.75(5)   | O(1)-C(1)-Mo(1)   | 177.60(16) |
| C(9)-Mo(2)-N(4)  | 89.32(7)   | O(2)-C(2)-Mo(1)   | 176.52(17) |
| C(3)-Mo(2)-N(1)  | 105.12(7)  | O(3)-C(3)-Mo(2)   | 175.88(16) |
| C(4)-Mo(2)-N(1)  | 163.27(7)  | O(4)-C(4)-Mo(2)   | 177.2(2)   |
| N(8)-Mo(2)-N(1)  | 75.66(5)   | C(6)-C(5)-Mo(1)   | 67.37(10)  |
| C(9)-Mo(2)-N(1)  | 90.18(8)   | C(7)-C(6)-C(5)    | 115.25(19) |
| N(4)-Mo(2)-N(1)  | 73.03(5)   | C(7)-C(6)-Mo(1)   | 75.88(11)  |
| C(3)-Mo(2)-C(10) | 107.50(8)  | C(5)-C(6)-Mo(1)   | 76.46(11)  |
| C(4)-Mo(2)-C(10) | 70.49(9)   | C(6)-C(7)-Mo(1)   | 67.84(10)  |
| N(8)-Mo(2)-C(10) | 149.41(8)  | C(9)-C(8)-Mo(2)   | 67.51(11)  |
| C(9)-Mo(2)-C(10) | 36.08(9)   | C(10)-C(9)-C(8)   | 115.7(2)   |
| N(4)-Mo(2)-C(10) | 84.02(7)   | C(10)-C(9)-Mo(2)  | 76.07(12)  |
| N(1)-Mo(2)-C(10) | 122.07(8)  | C(8)-C(9)-Mo(2)   | 76.43(12)  |
| C(3)-Mo(2)-C(8)  | 70.22(8)   | C(9)-C(10)-Mo(2)  | 67.85(12)  |
| C(4)-Mo(2)-C(8)  | 109.34(8)  | N(7)-C(11)-C(12)  | 107.47(15) |
| N(8)-Mo(2)-C(8)  | 148.61(8)  | N(7)-C(11)-C(13)  | 123.53(15) |
| C(9)-Mo(2)-C(8)  | 36.07(9)   | C(12)-C(11)-C(13) | 128.99(15) |
| N(4)-Mo(2)-C(8)  | 122.41(7)  | N(9)-C(12)-C(11)  | 108.42(15) |
| N(1)-Mo(2)-C(8)  | 87.15(7)   | N(9)-C(12)-C(15)  | 120.43(16) |
| C(10)-Mo(2)-C(8) | 61.77(9)   | C(11)-C(12)-C(15) | 131.12(16) |
| N(2)-N(1)-Mo(2)  | 122.08(12) | O(5)-C(13)-O(6)   | 126.39(17) |
| N(2)-N(1)-Mo(1)  | 126.94(12) | O(5)-C(13)-C(11)  | 123.13(16) |
| Mo(2)-N(1)-Mo(1) | 101.92(6)  | O(6)-C(13)-C(11)  | 110.47(14) |
| N(3)-N(2)-N(1)   | 179.5(2)   | O(7)-C(15)-O(8)   | 124.68(17) |
| N(5)-N(4)-Mo(1)  | 130.31(12) | O(7)-C(15)-C(12)  | 124.60(17) |
| N(5)-N(4)-Mo(2)  | 125.79(12) | O(8)-C(15)-C(12)  | 110.72(16) |
| Mo(1)-N(4)-Mo(2) | 103.38(6)  | C(13)-O(6)-C(14)  | 116.72(14) |
| N(6)-N(5)-N(4)   | 178.71(19) | C(15)-O(8)-C(16)  | 114.35(15) |
| C(11)-N(7)-N(8)  | 106.01(13) | C(19)-N(10)-C(20) | 110.2(2)   |
| C(11)-N(7)-Mo(1) | 136.29(12) | C(19)-N(10)-C(17) | 110.56(19) |
| N(8)-N(7)-Mo(1)  | 117.69(10) | C(20)-N(10)-C(17) | 108.68(17) |
| N(9)-N(8)-N(7)   | 111.51(13) | C(19)-N(10)-C(18) | 109.71(18) |
| N(9)-N(8)-Mo(2)  | 126.00(11) | C(20)-N(10)-C(18) | 108.32(16) |
| N(7)-N(8)-Mo(2)  | 122.24(10) | C(17)-N(10)-C(18) | 109.32(16) |
| N(8)-N(9)-C(12)  | 106.59(14) |                   |            |

---

Symmetry transformations used to generate equivalent atoms:

Table S13. Crystal data and structure refinement for  $[\text{N}(\text{CH}_3)_4][(\mu\text{-N}_3\text{C}_2\{\text{CO}_2\text{CH}_2\text{CH}_3\}_2\text{-}\kappa^2\text{N}^1:\text{N}^2)(\mu_{1,1}\text{-N}_3)_2\{\text{Mo}(\eta^3\text{-C}_3\text{H}_5)(\text{CO})_2\}_2] \cdot 1/2(\text{THF})$

|                                   |                                                                     |                               |
|-----------------------------------|---------------------------------------------------------------------|-------------------------------|
| Empirical formula                 | $\text{C}_{24}\text{H}_{36}\text{Mo}_2\text{N}_{10}\text{O}_{8.50}$ |                               |
| Formula weight                    | 792.51                                                              |                               |
| Temperature                       | 150(2) K                                                            |                               |
| Wavelength                        | 0.71073 Å                                                           |                               |
| Crystal system                    | Monoclinic                                                          |                               |
| Space group                       | $\text{P}2(1)/c$                                                    |                               |
| Unit cell dimensions              | $a = 13.4046(3)$ Å                                                  | $\alpha = 90^\circ$ .         |
|                                   | $b = 29.2236(6)$ Å                                                  | $\beta = 90.5145(10)^\circ$ . |
|                                   | $c = 17.1632(3)$ Å                                                  | $\gamma = 90^\circ$ .         |
| Volume                            | $6723.1(2)$ Å <sup>3</sup>                                          |                               |
| Z                                 | 8                                                                   |                               |
| Density (calculated)              | 1.566 Mg/m <sup>3</sup>                                             |                               |
| Absorption coefficient            | 0.806 mm <sup>-1</sup>                                              |                               |
| F(000)                            | 3216                                                                |                               |
| Crystal size                      | 0.18 x 0.15 x 0.10 mm <sup>3</sup>                                  |                               |
| Theta range for data collection   | 1.38 to 27.50°.                                                     |                               |
| Index ranges                      | $-17 \leq h \leq 17$ , $-37 \leq k \leq 37$ , $-22 \leq l \leq 22$  |                               |
| Reflections collected             | 42118                                                               |                               |
| Independent reflections           | 15379 [R(int) = 0.0450]                                             |                               |
| Completeness to theta = 27.50°    | 99.5 %                                                              |                               |
| Absorption correction             | Semi-empirical from equivalents                                     |                               |
| Max. and min. transmission        | 0.926 and 0.829                                                     |                               |
| Refinement method                 | Full-matrix least-squares on F <sup>2</sup>                         |                               |
| Data / restraints / parameters    | 15379 / 0 / 814                                                     |                               |
| Goodness-of-fit on F <sup>2</sup> | 1.062                                                               |                               |
| Final R indices [I > 2sigma(I)]   | R1 = 0.0428, wR2 = 0.1126                                           |                               |
| R indices (all data)              | R1 = 0.0786, wR2 = 0.1226                                           |                               |
| Largest diff. peak and hole       | 1.367 and -0.590 e.Å <sup>-3</sup>                                  |                               |



Table S14. Bond lengths [ $\text{\AA}$ ] and angles [ $^\circ$ ] for  $[\text{N}(\text{CH}_3)_4][(\mu\text{-N}_3\text{C}_2\{\text{CO}_2\text{CH}_2\text{CH}_3\}_2\text{-}\kappa^2\text{N}^1:\text{N}^2)(\mu_{1,1}\text{-N}_3)_2\{\text{Mo}(\eta^3\text{-C}_3\text{H}_5)(\text{CO})_2\}_2] \cdot 1/2(\text{THF})$

|             |          |             |          |
|-------------|----------|-------------|----------|
| Mo(1)-C(1)  | 1.961(4) | Mo(3)-C(20) | 1.953(4) |
| Mo(1)-C(2)  | 1.972(5) | Mo(3)-C(19) | 1.954(4) |
| Mo(1)-C(6)  | 2.197(4) | Mo(3)-C(24) | 2.195(4) |
| Mo(1)-N(7)  | 2.233(3) | Mo(3)-N(16) | 2.224(3) |
| Mo(1)-N(4)  | 2.255(3) | Mo(3)-N(13) | 2.246(3) |
| Mo(1)-N(1)  | 2.266(3) | Mo(3)-N(10) | 2.276(3) |
| Mo(1)-C(5)  | 2.304(4) | Mo(3)-C(25) | 2.302(4) |
| Mo(1)-C(7)  | 2.318(4) | Mo(3)-C(23) | 2.317(4) |
| Mo(2)-C(4)  | 1.941(4) | Mo(4)-C(21) | 1.942(5) |
| Mo(2)-C(3)  | 1.947(5) | Mo(4)-C(22) | 1.966(4) |
| Mo(2)-N(8)  | 2.206(3) | Mo(4)-N(17) | 2.196(3) |
| Mo(2)-C(9)  | 2.208(4) | Mo(4)-C(27) | 2.202(4) |
| Mo(2)-N(4)  | 2.250(3) | Mo(4)-N(13) | 2.260(3) |
| Mo(2)-N(1)  | 2.275(3) | Mo(4)-N(10) | 2.267(3) |
| Mo(2)-C(10) | 2.315(4) | Mo(4)-C(26) | 2.304(4) |
| Mo(2)-C(8)  | 2.318(4) | Mo(4)-C(28) | 2.316(4) |
| N(1)-N(2)   | 1.184(4) | N(10)-N(11) | 1.186(5) |
| N(2)-N(3)   | 1.155(4) | N(11)-N(12) | 1.140(5) |
| N(4)-N(5)   | 1.208(4) | N(13)-N(14) | 1.190(4) |
| N(5)-N(6)   | 1.145(5) | N(14)-N(15) | 1.147(5) |
| N(7)-C(11)  | 1.337(4) | N(16)-C(29) | 1.340(4) |
| N(7)-N(8)   | 1.346(4) | N(16)-N(17) | 1.359(4) |
| N(8)-N(9)   | 1.323(4) | N(17)-N(18) | 1.318(4) |
| N(9)-C(12)  | 1.350(5) | N(18)-C(30) | 1.350(5) |
| C(1)-O(1)   | 1.150(5) | C(19)-O(9)  | 1.153(4) |
| C(2)-O(2)   | 1.144(5) | C(20)-O(10) | 1.154(5) |
| C(3)-O(3)   | 1.156(5) | C(21)-O(11) | 1.165(5) |
| C(4)-O(4)   | 1.158(5) | C(22)-O(12) | 1.154(5) |
| C(5)-C(6)   | 1.410(6) | C(23)-C(24) | 1.384(6) |
| C(6)-C(7)   | 1.398(6) | C(24)-C(25) | 1.406(6) |
| C(8)-C(9)   | 1.398(7) | C(26)-C(27) | 1.385(6) |
| C(9)-C(10)  | 1.414(7) | C(27)-C(28) | 1.415(6) |
| C(11)-C(12) | 1.379(5) | C(29)-C(30) | 1.385(5) |
| C(11)-C(13) | 1.500(5) | C(29)-C(31) | 1.499(5) |
| C(12)-C(16) | 1.498(5) | C(30)-C(34) | 1.479(5) |
| C(13)-O(5)  | 1.205(4) | C(31)-O(13) | 1.186(5) |
| C(13)-O(6)  | 1.330(5) | C(31)-O(14) | 1.334(5) |
| C(14)-O(6)  | 1.459(5) | C(32)-O(14) | 1.466(5) |
| C(14)-C(15) | 1.505(6) | C(32)-C(33) | 1.490(7) |
| C(16)-O(7)  | 1.196(5) | C(34)-O(15) | 1.203(5) |
| C(16)-O(8)  | 1.330(5) | C(34)-O(16) | 1.320(5) |
| C(17)-O(8)  | 1.451(4) | C(35)-O(16) | 1.452(4) |
| C(17)-C(18) | 1.508(6) | C(35)-C(36) | 1.489(6) |

|             |          |             |          |
|-------------|----------|-------------|----------|
| N(19)-C(37) | 1.440(6) | N(20)-C(41) | 1.693(8) |
| N(19)-C(40) | 1.454(6) | O(17)-C(48) | 1.394(6) |
| N(19)-C(39) | 1.468(6) | O(17)-C(45) | 1.417(7) |
| N(19)-C(38) | 1.576(7) | C(45)-C(46) | 1.364(8) |
| N(20)-C(42) | 1.430(6) | C(46)-C(47) | 1.499(8) |
| N(20)-C(43) | 1.448(6) | C(47)-C(48) | 1.488(7) |
| N(20)-C(44) | 1.453(5) |             |          |

|                 |            |                  |            |
|-----------------|------------|------------------|------------|
| C(1)-Mo(1)-C(2) | 82.26(17)  | C(4)-Mo(2)-N(1)  | 166.61(15) |
| C(1)-Mo(1)-C(6) | 102.82(16) | C(3)-Mo(2)-N(1)  | 104.64(16) |
| C(2)-Mo(1)-C(6) | 103.06(17) | N(8)-Mo(2)-N(1)  | 76.23(11)  |
| C(1)-Mo(1)-N(7) | 92.11(14)  | C(9)-Mo(2)-N(1)  | 87.79(14)  |
| C(2)-Mo(1)-N(7) | 92.24(15)  | N(4)-Mo(2)-N(1)  | 73.60(11)  |
| C(6)-Mo(1)-N(7) | 159.81(14) | C(4)-Mo(2)-C(10) | 70.03(17)  |
| C(1)-Mo(1)-N(4) | 169.22(14) | C(3)-Mo(2)-C(10) | 107.74(18) |
| C(2)-Mo(1)-N(4) | 99.51(15)  | N(8)-Mo(2)-C(10) | 150.32(16) |
| C(6)-Mo(1)-N(4) | 87.20(14)  | C(9)-Mo(2)-C(10) | 36.32(17)  |
| N(7)-Mo(1)-N(4) | 77.22(11)  | N(4)-Mo(2)-C(10) | 83.61(15)  |
| C(1)-Mo(1)-N(1) | 102.69(15) | N(1)-Mo(2)-C(10) | 119.99(15) |
| C(2)-Mo(1)-N(1) | 168.32(15) | C(4)-Mo(2)-C(8)  | 108.61(17) |
| C(6)-Mo(1)-N(1) | 86.29(14)  | C(3)-Mo(2)-C(8)  | 69.90(18)  |
| N(7)-Mo(1)-N(1) | 77.13(11)  | N(8)-Mo(2)-C(8)  | 147.50(15) |
| N(4)-Mo(1)-N(1) | 73.66(11)  | C(9)-Mo(2)-C(8)  | 35.87(17)  |
| C(1)-Mo(1)-C(5) | 107.25(16) | N(4)-Mo(2)-C(8)  | 122.05(15) |
| C(2)-Mo(1)-C(5) | 68.19(16)  | N(1)-Mo(2)-C(8)  | 84.58(14)  |
| C(6)-Mo(1)-C(5) | 36.42(15)  | C(10)-Mo(2)-C(8) | 62.16(18)  |
| N(7)-Mo(1)-C(5) | 149.57(13) | N(2)-N(1)-Mo(1)  | 126.8(3)   |
| N(4)-Mo(1)-C(5) | 83.15(13)  | N(2)-N(1)-Mo(2)  | 130.9(3)   |
| N(1)-Mo(1)-C(5) | 119.30(14) | Mo(1)-N(1)-Mo(2) | 101.91(12) |
| C(1)-Mo(1)-C(7) | 68.89(16)  | N(3)-N(2)-N(1)   | 178.6(4)   |
| C(2)-Mo(1)-C(7) | 108.95(17) | N(5)-N(4)-Mo(2)  | 125.5(3)   |
| C(6)-Mo(1)-C(7) | 35.95(15)  | N(5)-N(4)-Mo(1)  | 124.9(3)   |
| N(7)-Mo(1)-C(7) | 148.51(14) | Mo(2)-N(4)-Mo(1) | 103.01(12) |
| N(4)-Mo(1)-C(7) | 119.89(14) | N(6)-N(5)-N(4)   | 178.9(5)   |
| N(1)-Mo(1)-C(7) | 82.73(14)  | C(11)-N(7)-N(8)  | 107.0(3)   |
| C(5)-Mo(1)-C(7) | 61.92(15)  | C(11)-N(7)-Mo(1) | 134.6(3)   |
| C(4)-Mo(2)-C(3) | 78.68(18)  | N(8)-N(7)-Mo(1)  | 117.9(2)   |
| C(4)-Mo(2)-N(8) | 90.93(14)  | N(9)-N(8)-N(7)   | 111.3(3)   |
| C(3)-Mo(2)-N(8) | 89.69(15)  | N(9)-N(8)-Mo(2)  | 127.5(2)   |
| C(4)-Mo(2)-C(9) | 104.19(17) | N(7)-N(8)-Mo(2)  | 120.9(2)   |
| C(3)-Mo(2)-C(9) | 103.50(18) | N(8)-N(9)-C(12)  | 106.0(3)   |
| N(8)-Mo(2)-C(9) | 161.51(14) | O(1)-C(1)-Mo(1)  | 177.4(4)   |
| C(4)-Mo(2)-N(4) | 100.20(15) | O(2)-C(2)-Mo(1)  | 178.2(4)   |
| C(3)-Mo(2)-N(4) | 167.10(15) | O(3)-C(3)-Mo(2)  | 176.1(4)   |
| N(8)-Mo(2)-N(4) | 77.45(11)  | O(4)-C(4)-Mo(2)  | 177.8(4)   |
| C(9)-Mo(2)-N(4) | 89.27(16)  | C(6)-C(5)-Mo(1)  | 67.7(2)    |

|                   |            |                   |            |
|-------------------|------------|-------------------|------------|
| C(7)-C(6)-C(5)    | 115.7(4)   | C(20)-Mo(3)-C(23) | 69.49(15)  |
| C(7)-C(6)-Mo(1)   | 76.8(2)    | C(19)-Mo(3)-C(23) | 109.22(15) |
| C(5)-C(6)-Mo(1)   | 75.9(2)    | C(24)-Mo(3)-C(23) | 35.58(15)  |
| C(6)-C(7)-Mo(1)   | 67.3(2)    | N(16)-Mo(3)-C(23) | 151.03(13) |
| C(9)-C(8)-Mo(2)   | 67.8(2)    | N(13)-Mo(3)-C(23) | 82.56(13)  |
| C(8)-C(9)-C(10)   | 116.6(4)   | N(10)-Mo(3)-C(23) | 118.17(14) |
| C(8)-C(9)-Mo(2)   | 76.3(3)    | C(25)-Mo(3)-C(23) | 61.77(16)  |
| C(10)-C(9)-Mo(2)  | 76.0(3)    | C(21)-Mo(4)-C(22) | 81.27(17)  |
| C(9)-C(10)-Mo(2)  | 67.7(2)    | C(21)-Mo(4)-N(17) | 89.29(14)  |
| N(7)-C(11)-C(12)  | 107.0(3)   | C(22)-Mo(4)-N(17) | 90.49(14)  |
| N(7)-C(11)-C(13)  | 123.3(3)   | C(21)-Mo(4)-C(27) | 104.03(17) |
| C(12)-C(11)-C(13) | 129.7(3)   | C(22)-Mo(4)-C(27) | 104.68(16) |
| N(9)-C(12)-C(11)  | 108.7(3)   | N(17)-Mo(4)-C(27) | 161.03(14) |
| N(9)-C(12)-C(16)  | 120.7(3)   | C(21)-Mo(4)-N(13) | 166.59(14) |
| C(11)-C(12)-C(16) | 130.4(4)   | C(22)-Mo(4)-N(13) | 98.92(14)  |
| O(5)-C(13)-O(6)   | 125.7(4)   | N(17)-Mo(4)-N(13) | 77.30(11)  |
| O(5)-C(13)-C(11)  | 122.8(4)   | C(27)-Mo(4)-N(13) | 88.95(15)  |
| O(6)-C(13)-C(11)  | 111.5(3)   | C(21)-Mo(4)-N(10) | 103.24(15) |
| O(6)-C(14)-C(15)  | 107.7(4)   | C(22)-Mo(4)-N(10) | 165.77(14) |
| O(7)-C(16)-O(8)   | 126.1(4)   | N(17)-Mo(4)-N(10) | 76.19(11)  |
| O(7)-C(16)-C(12)  | 124.5(4)   | C(27)-Mo(4)-N(10) | 87.48(14)  |
| O(8)-C(16)-C(12)  | 109.4(3)   | N(13)-Mo(4)-N(10) | 73.53(11)  |
| O(8)-C(17)-C(18)  | 106.1(3)   | C(21)-Mo(4)-C(26) | 107.45(17) |
| C(13)-O(6)-C(14)  | 115.0(3)   | C(22)-Mo(4)-C(26) | 70.30(16)  |
| C(16)-O(8)-C(17)  | 115.7(3)   | N(17)-Mo(4)-C(26) | 151.60(15) |
| C(20)-Mo(3)-C(19) | 82.31(17)  | C(27)-Mo(4)-C(26) | 35.71(15)  |
| C(20)-Mo(3)-C(24) | 103.42(16) | N(13)-Mo(4)-C(26) | 85.03(14)  |
| C(19)-Mo(3)-C(24) | 104.37(15) | N(10)-Mo(4)-C(26) | 119.94(14) |
| C(20)-Mo(3)-N(16) | 92.32(13)  | C(21)-Mo(4)-C(28) | 70.04(17)  |
| C(19)-Mo(3)-N(16) | 89.53(13)  | C(22)-Mo(4)-C(28) | 111.04(17) |
| C(24)-Mo(3)-N(16) | 160.12(13) | N(17)-Mo(4)-C(28) | 146.54(15) |
| C(20)-Mo(3)-N(13) | 99.22(14)  | C(27)-Mo(4)-C(28) | 36.39(17)  |
| C(19)-Mo(3)-N(13) | 167.72(13) | N(13)-Mo(4)-C(28) | 121.63(15) |
| C(24)-Mo(3)-N(13) | 87.19(13)  | N(10)-Mo(4)-C(28) | 83.12(14)  |
| N(16)-Mo(3)-N(13) | 78.25(11)  | C(26)-Mo(4)-C(28) | 61.85(17)  |
| C(20)-Mo(3)-N(10) | 167.90(14) | N(11)-N(10)-Mo(4) | 127.8(3)   |
| C(19)-Mo(3)-N(10) | 102.61(15) | N(11)-N(10)-Mo(3) | 130.1(3)   |
| C(24)-Mo(3)-N(10) | 86.22(14)  | Mo(4)-N(10)-Mo(3) | 101.84(13) |
| N(16)-Mo(3)-N(10) | 76.79(11)  | N(12)-N(11)-N(10) | 179.4(5)   |
| N(13)-Mo(3)-N(10) | 73.63(11)  | N(14)-N(13)-Mo(3) | 127.2(3)   |
| C(20)-Mo(3)-C(25) | 109.16(16) | N(14)-N(13)-Mo(4) | 124.7(3)   |
| C(19)-Mo(3)-C(25) | 69.91(15)  | Mo(3)-N(13)-Mo(4) | 103.03(12) |
| C(24)-Mo(3)-C(25) | 36.34(14)  | N(15)-N(14)-N(13) | 178.9(4)   |
| N(16)-Mo(3)-C(25) | 147.19(14) | C(29)-N(16)-N(17) | 106.8(3)   |
| N(13)-Mo(3)-C(25) | 120.36(13) | C(29)-N(16)-Mo(3) | 135.8(2)   |
| N(10)-Mo(3)-C(25) | 82.94(14)  | N(17)-N(16)-Mo(3) | 117.1(2)   |

|                   |          |                   |          |
|-------------------|----------|-------------------|----------|
| N(18)-N(17)-N(16) | 110.9(3) | O(14)-C(31)-C(29) | 109.2(3) |
| N(18)-N(17)-Mo(4) | 127.2(2) | O(14)-C(32)-C(33) | 107.2(4) |
| N(16)-N(17)-Mo(4) | 121.7(2) | O(15)-C(34)-O(16) | 125.2(4) |
| N(17)-N(18)-C(30) | 106.8(3) | O(15)-C(34)-C(30) | 124.4(4) |
| O(9)-C(19)-Mo(3)  | 178.9(4) | O(16)-C(34)-C(30) | 110.4(3) |
| O(10)-C(20)-Mo(3) | 178.2(3) | O(16)-C(35)-C(36) | 106.3(4) |
| O(11)-C(21)-Mo(4) | 177.0(4) | C(31)-O(14)-C(32) | 115.2(3) |
| O(12)-C(22)-Mo(4) | 179.0(4) | C(34)-O(16)-C(35) | 116.4(3) |
| C(24)-C(23)-Mo(3) | 67.4(2)  | C(37)-N(19)-C(40) | 114.1(4) |
| C(23)-C(24)-C(25) | 116.4(4) | C(37)-N(19)-C(39) | 110.5(4) |
| C(23)-C(24)-Mo(3) | 77.0(2)  | C(40)-N(19)-C(39) | 112.2(4) |
| C(25)-C(24)-Mo(3) | 76.0(2)  | C(37)-N(19)-C(38) | 107.1(5) |
| C(24)-C(25)-Mo(3) | 67.7(2)  | C(40)-N(19)-C(38) | 105.1(4) |
| C(27)-C(26)-Mo(4) | 68.1(2)  | C(39)-N(19)-C(38) | 107.4(4) |
| C(26)-C(27)-C(28) | 116.0(4) | C(42)-N(20)-C(43) | 118.4(4) |
| C(26)-C(27)-Mo(4) | 76.2(2)  | C(42)-N(20)-C(44) | 117.5(4) |
| C(28)-C(27)-Mo(4) | 76.2(3)  | C(43)-N(20)-C(44) | 112.9(4) |
| C(27)-C(28)-Mo(4) | 67.4(2)  | C(42)-N(20)-C(41) | 98.4(5)  |
| N(16)-C(29)-C(30) | 107.2(3) | C(43)-N(20)-C(41) | 102.2(4) |
| N(16)-C(29)-C(31) | 123.7(3) | C(44)-N(20)-C(41) | 103.3(4) |
| C(30)-C(29)-C(31) | 129.0(3) | C(48)-O(17)-C(45) | 107.3(5) |
| N(18)-C(30)-C(29) | 108.3(3) | C(46)-C(45)-O(17) | 109.1(6) |
| N(18)-C(30)-C(34) | 121.3(3) | C(45)-C(46)-C(47) | 104.2(6) |
| C(29)-C(30)-C(34) | 130.4(4) | C(48)-C(47)-C(46) | 104.4(5) |
| O(13)-C(31)-O(14) | 126.7(4) | O(17)-C(48)-C(47) | 106.6(5) |
| O(13)-C(31)-C(29) | 124.1(4) |                   |          |

---

Symmetry transformations used to generate equivalent atoms:
